# Supplementary material
Source: PubMed Central journal article supplement (PMC6629252)
Supplement: jciinsight-4-128014-s111.pdf [file jciinsight-4-128014-s111.pdf]

Landscape of innate immune system transcriptome and  
acute T-cell mediated rejection of human kidney allografts

Franco B. Mueller, Hua Yang, Michelle Lubetzky, Akanksha Verma, John R. Lee,  
Darshana M. Dadhania, Jenny Z. Xiang, Steven Salvatore, Surya V. Seshan,  
Vijay K. Sharma, Olivier Elemento, Manikkam Suthanthiran, and Thangamani Muthukumar

**Supplemental Materials**

Supplemental Figure 1. Banff histopathology scores and global intragraft expression of mRNAs in human kidney allografts.

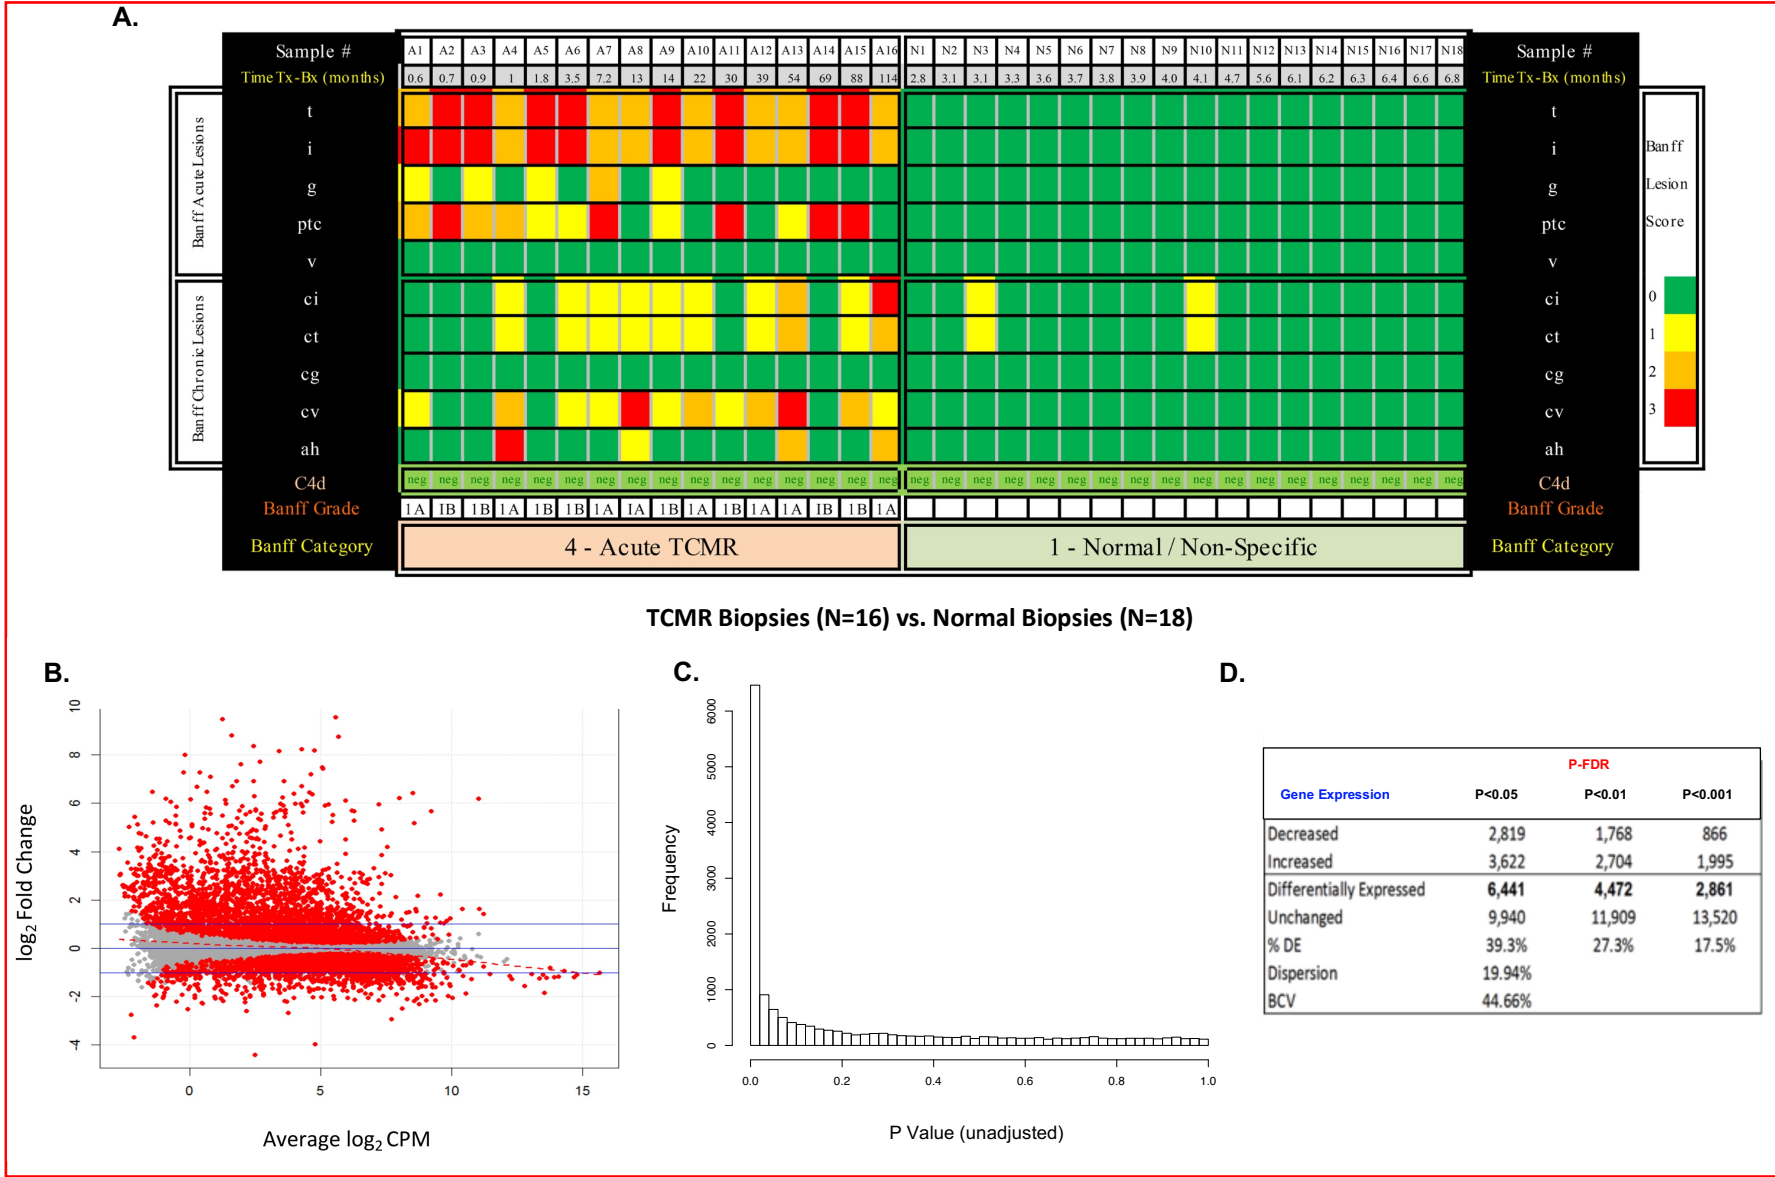

**(A) Banff histopathological scores of the 34 kidney allograft biopsies obtained from 34 kidney allograft recipients.** Biopsy tissue sections were stained with hematoxylin and eosin, periodic acid Schiff, and Masson trichrome for light microscopic evaluation. Staining for polyoma virus was done using affinity-purified and agarose-conjugated IgG<sub>2a</sub> mouse monoclonal antibody (Calbiochem, San Diego, CA) that recognizes a 94-kDa SV40 large T antigen. Indirect immunofluorescence for complement factor 4 degradation (C4d) product was done on cryosections using a monoclonal anti-C4d antibody (Quidel, Santa Clara, CA). The biopsies were categorized using the Banff 2017 update of the Banff '97 classification (1). The Banff diagnostic categories include acute T-cell mediated rejection (Acute TCMR, Sample # A1 through A16) and normal/non-specific (Normal, Sample # N1 through N18). Immunostaining of the biopsies for CD3 confirmed the higher abundance of CD3+ T lymphocytes in TCMR (315 cells per high power field (40x), median) compared to Normal (40 cells). All biopsies classified as acute TCMR were performed because of acute graft dysfunction. All biopsies classified as Normal were performed for surveillance purpose in recipients without acute graft dysfunction. The median number of glomeruli per biopsy sample was 14 (range 9-18). Colors represent Banff scores from 0 to 3. Banff grade and Banff acute scores for tubulitis (t), interstitial inflammation (i), glomerulitis (g), peritubular capillary inflammation (ptc) score and vascular inflammation (v). Banff chronic scores for interstitial fibrosis (ci), tubular atrophy (ct) score, chronic glomerulopathy (cg), chronic vascular lesions (cv) score and arteriolar hyaline thickening (ah) are shown for each biopsy. Also shown in the figure is the staining for complement factor 4d (C4d) in the peritubular capillaries.

**(B) Smear plot of the mRNA expression between TCMR and Normal biopsies.** Library preparation for RNA sequencing was done by poly-A selection of mRNA and conversion to single-stranded cDNA using random hexamer primer followed by second strand generation to create double stranded cDNA. The first batch contained 15 samples (10 TCMR and 5 Normal) and were sequenced single-end, 6 pooled libraries per lane of a flow cell, on a HiSeq 2500 (Illumina, Inc., San Diego, CA) sequencer. The second batch contained 19 samples (6 TCMR and 13 Normal) and were sequenced paired-end, 10 pooled libraries per lane of a flow cell, on a HiSeq 4000 sequencer. The raw sequencing data were stored in FASTQ format. The 101 bp single and paired-end reads were aligned to human genome (GRCh37/hg19 assembly) using Tophat2 (2). The human UCSC reference annotation was used to align and quantitate the transcripts. A gene was considered expressed in the TCMR or Normal biopsy when its normalized mRNA count was  $\geq 1$  count per million mapped reads (cpm) in at least 1 sample in that group. The X-axis is the average RNA counts per million mapped reads (CPM), depicted as average  $\log_2$

CPM. The differential intragraft expression of mRNAs between TCMR and Normal is depicted as  $\log_2$ Fold Change on the Y-axis. Fold change was determined using edgeR, a software package released by Bioconductor, an R programming language-based open source, open development software project. edgeR fits a negative binomial model of the sequence data and derives probability values for the differential expression using an exact test, which uses a quantile-adjusted conditional maximum likelihood method (3). Knowing the conditional distribution for the sum of counts in a group, the exact P values are computed by summing over all sums of counts that have a probability less than the probability under the null hypothesis of the observed sum of counts. The exact test for the negative binomial distribution has strong parallels with Fisher's exact test. Probability values were adjusted for FDR using the Benjamini-Hochberg method and is the expected proportion of false positives among all the statistically significant P values ( $<0.05$ ). We considered  $P\text{-FDR}<0.05$  as statistically significant. A value of 0 on the Y-axis corresponds to no difference between the expression in TCMR and Normal (TCMR/Normal =1). A value above 0 denotes mRNA abundance in TCMR is greater than in Normal biopsy. A value below 0 denotes mRNA abundance in TCMR is less than in Normal biopsy. Each dot represents a mRNA. Red dots are mRNAs whose difference in expression between TCMR and Normal is statistically significant at  $P<0.05$ .

**(C) Histogram of P values derived from comparing mRNAs between TCMR and Normal.** We identified a total of 16,381 protein-coding genes including mitochondrial genes that were expressed in the kidney allograft. A gene was considered expressed in the TCMR or Normal group when its normalized mRNA count was  $\geq 1$  count per million mapped reads in at least 1 sample in that group. The difference in the expression of a gene between TCMR and Normal was compared using the exact test implemented in edgeR. Graph depicts the histogram of all the 16,381 P values. Each P value tests the null hypothesis of no difference in gene expression between TCMR and Normal. If all 16,381 null hypotheses are true, then the P values, by definition, follow a uniform distribution between 0 to 1 and the histogram is flat (4). Among the 16,381 P values, 8658 (53%) were  $>0.05$ . As depicted, the distribution of P values (except those closer to 0) was flat and represents the null P values. On the contrary, if the null hypothesis is not true, then there is greater occurrence of low P values close to 0. Among the 16,381 P values, 7723 (47%) were  $<0.05$ . As depicted, the peak of the histogram is close to 0 which represents the alternate hypothesis. Thus, the shape of the histogram reassured us that the vast majority of 7723 statistically significant ( $<0.05$ ) P values were not false positives.



**(D) Differentially expressed mRNAs between TCMR and Normal.** Table depicts the number of mRNAs with higher or lower abundance in TCMR compared to Normal, and the number of mRNAs differentially expressed (DE) at different levels of significance. Among the 7723 genes that were statistically significant at  $P < 0.05$  between TCMR and Normal, 6441 (83%) were statistically significant at  $P\text{-FDR} < 0.05$ . Among the 6441 (39.3% of the 16,381 total genes) differentially expressed mRNAs, the abundance of 3622 (56%) were higher and that of 2819 (44%) were lower in TCMR compared to Normal. The  $P\text{-FDR}$  is the expected proportion of false positives among all the statistically significant  $P$  values ( $< 0.05$ ). Thus, among the 6441 mRNAs that were significantly different between TCMR and Normal, 322 (5%) are expected to be false positive. Biological coefficient of variation (BCV), estimated as the square root of dispersion, is the coefficient of variation with which the (unknown) true abundance of the gene varies between biological replicates. It represents the CV that would remain between biological replicates if the sequencing depth could be increased indefinitely.

1. Haas M, Loupy A, Lefaucheur C, Roufosse C, Glotz D, Seron D, et al. The Banff 2017 Kidney Meeting Report: Revised diagnostic criteria for chronic active T cell-mediated rejection, antibody-mediated rejection, and prospects for integrative endpoints for next-generation clinical trials. *Am J Transplant*. 2018;18(2):293-307.
2. Kim D, Pertea G, Trapnell C, Pimentel H, Kelley R, and Salzberg SL. TopHat2: accurate alignment of transcriptomes in the presence of insertions, deletions and gene fusions. *Genome Biol*. 2013;14(4):R36.
3. Robinson MD, McCarthy DJ, and Smyth GK. edgeR: a Bioconductor package for differential expression analysis of digital gene expression data. *Bioinformatics*. 2010;26(1):139-140. <https://bioconductor.org/packages/release/bioc/html/edgeR.html>
4. Breheny P, Stromberg A, Lambert J.  $p$ -Value Histograms: Inference and Diagnostics. *High Throughput*. 2018;7(3).pii:E23.

Supplemental Figure 2. Relationship between the intragraft abundance of mRNAs for pattern recognition receptor TLR2 and its downstream signaling molecules in kidney allografts.

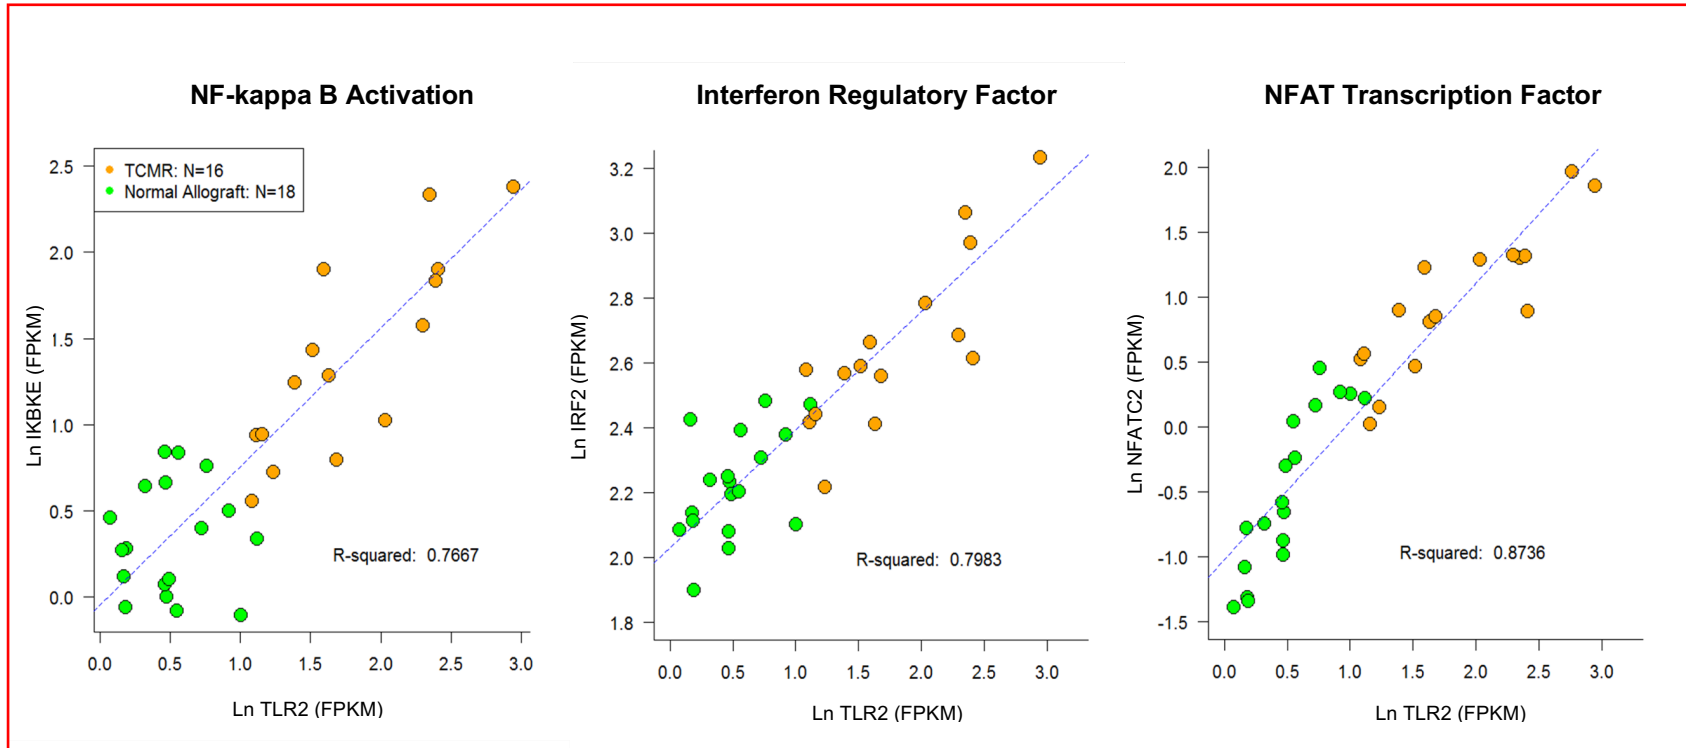

TLR signaling results in the activation of NF-kappa-B, Interferon regulatory factors, and NAFT pathways. Panels depict the significant positive association between TLR2 and IKBKE, a key gene of NF-kappa-B pathway **(A)**; between TLR2 and IRF2, an interferon regulatory factor **(B)**; and between TLR2 and NFATC2, a member of the NFAT family **(C)**. FPKM is the number of fragments per kilobase of exon per million reads mapped value, which normalizes the RNA sequencing data for sequencing depth (per million scaling factor) and gene length (per kilobase scaling factor). mRNA abundance is represented as  $\log_e$ FPKM values. The strength of the association is expressed as the coefficient of determination ( $r^2$ ).

Supplemental Figure 3. Intragraft abundance of mRNA calcineurin subunits and IMPDH isoform 2 in TCMR and Normal Biopsies.

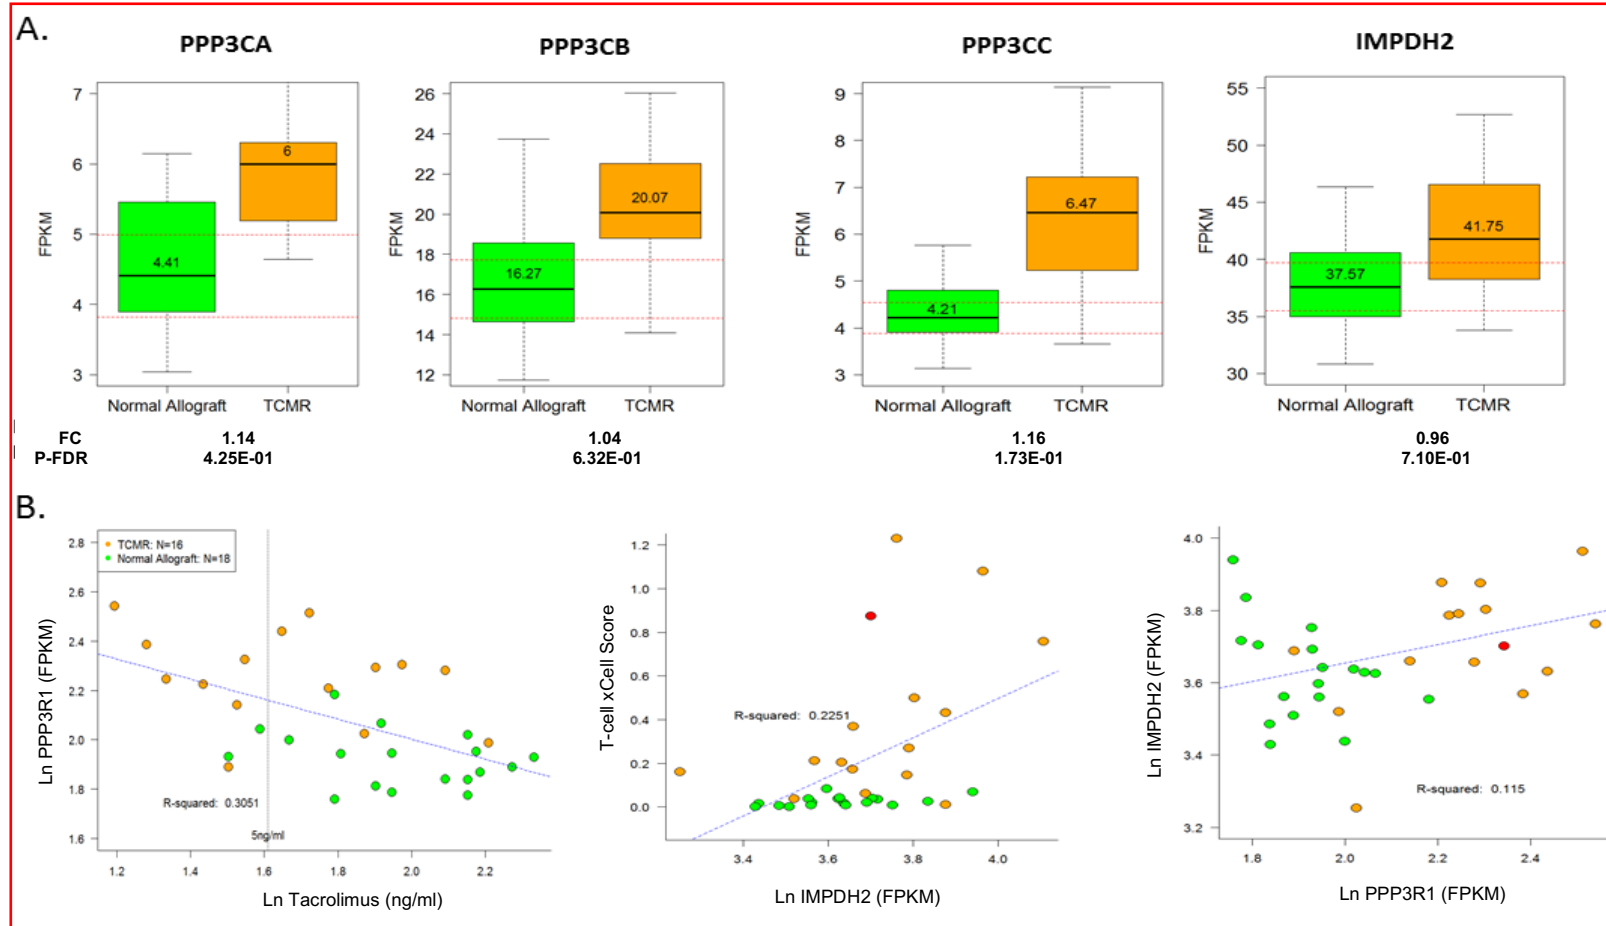

Box plots depict the intragraft abundance of mRNA for calcineurin isoforms PPP3CA (catalytic subunit alpha), PPP3CB (catalytic subunit beta), and PPP3CC (catalytic subunit gamma), and inosine-5'-monophosphate dehydrogenase isoform 2 (IMPDH2) in TCMR and Normal biopsies **(A)**. The horizontal dotted red lines represent the 95% confidence interval of the Normal group. Scatter plots **(B)** depict the relation between mRNA abundance of calcineurin isoform PPP3R1 (regulatory subunit alpha) and tacrolimus whole blood trough level at the time of kidney allograft biopsy (left panel), IMPDH2 and a T-cell enrichment score, derived by xCell (1), an in-silico cell-type enrichment analysis (middle panel), and PPP3R1 and IMPDH2 (right panel).

1. Aran D, Hu Z, and Butte AJ. *xCell: digitally portraying the tissue cellular heterogeneity landscape. Genome Biol. 2017;18(1):220.*

Supplemental Figure 4. Relationship between intragraft abundance of mRNAs for calcineurin subunit PPP3R1 and Ca<sup>2+</sup>ATPases in kidney allografts.

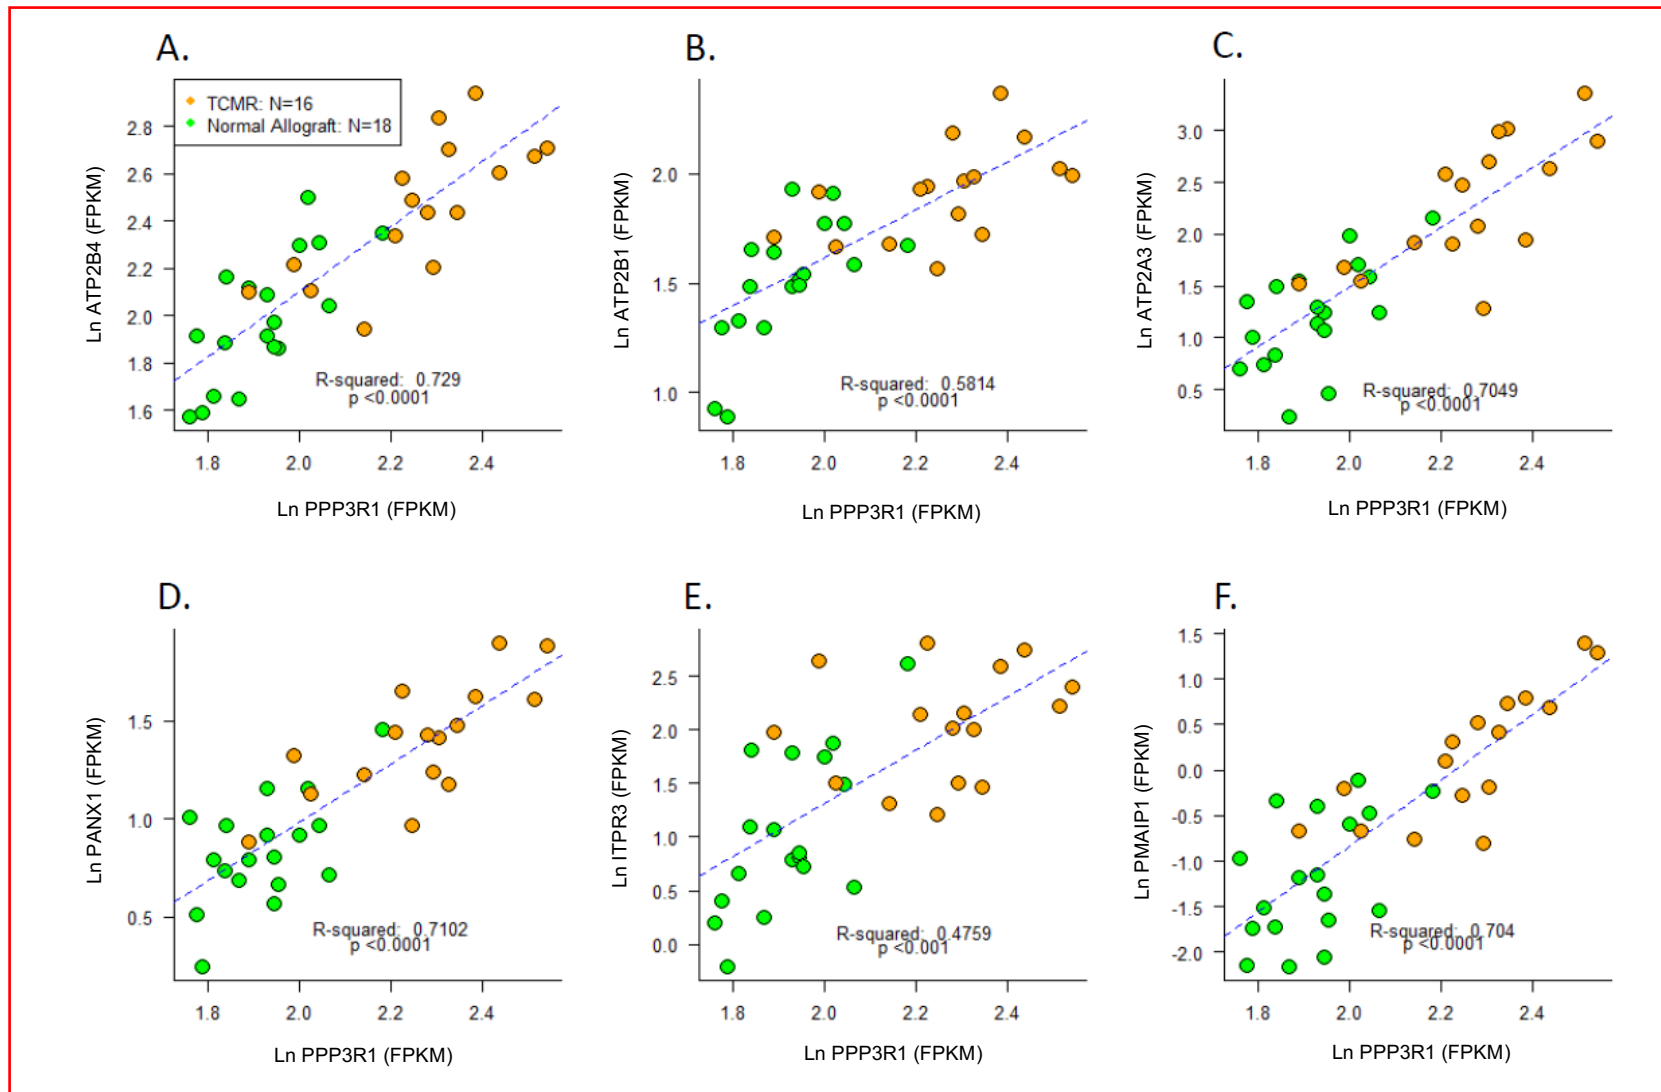

All four calcineurin subunits were expressed in the kidney allograft. The intragraft abundance of PPP3CA (catalytic subunit alpha), PPP3CB (catalytic subunit beta), PPP3CC (catalytic subunit gamma), and PPP3R1 (regulatory subunit alpha) were higher in TCMR compared to Normal biopsy. However, the difference in abundance was statistically significant only for PPP3R1. The top panel depicts the positive association between the abundance of PPP3R1 mRNA and the abundance of mRNA for ATP2B4 (**A**), mRNA for ATP2B1 (**B**), and mRNA for ATP2A3 (**C**). The bottom panel depicts the positive relationship between the abundance of PPP3R1 mRNA and the abundance of PANX1 mRNA (**D**), ITPR3 mRNA (**E**), and PMAIP1 mRNA (**F**). The plasma membrane calcium ATPase (PMCA) ATP2B4 pumps  $\text{Ca}^{2+}$  from the cytosol to the exterior and ATP2B1 is another PMCA. The sarcoplasmic reticular  $\text{Ca}^{2+}$ ATPase (SERCA) ATP2A3 pumps  $\text{Ca}^{2+}$  from cytosol into the endoplasmic reticulum. PANX1 is a  $\text{Ca}^{2+}$  leak channel that regulates endoplasmic reticulum  $\text{Ca}^{2+}$  homeostasis; ITPR3, is an intracellular channel that mediates  $\text{Ca}^{2+}$  release from the endoplasmic reticulum following stimulation by inositol 1,4,5-trisphosphate; and PMAIP1 (Noxa) promotes mitochondrial membrane changes and efflux of apoptogenic proteins from the mitochondria.

Supplemental Figure 5. Immunostaining of kidney allografts for markers of innate immune system.

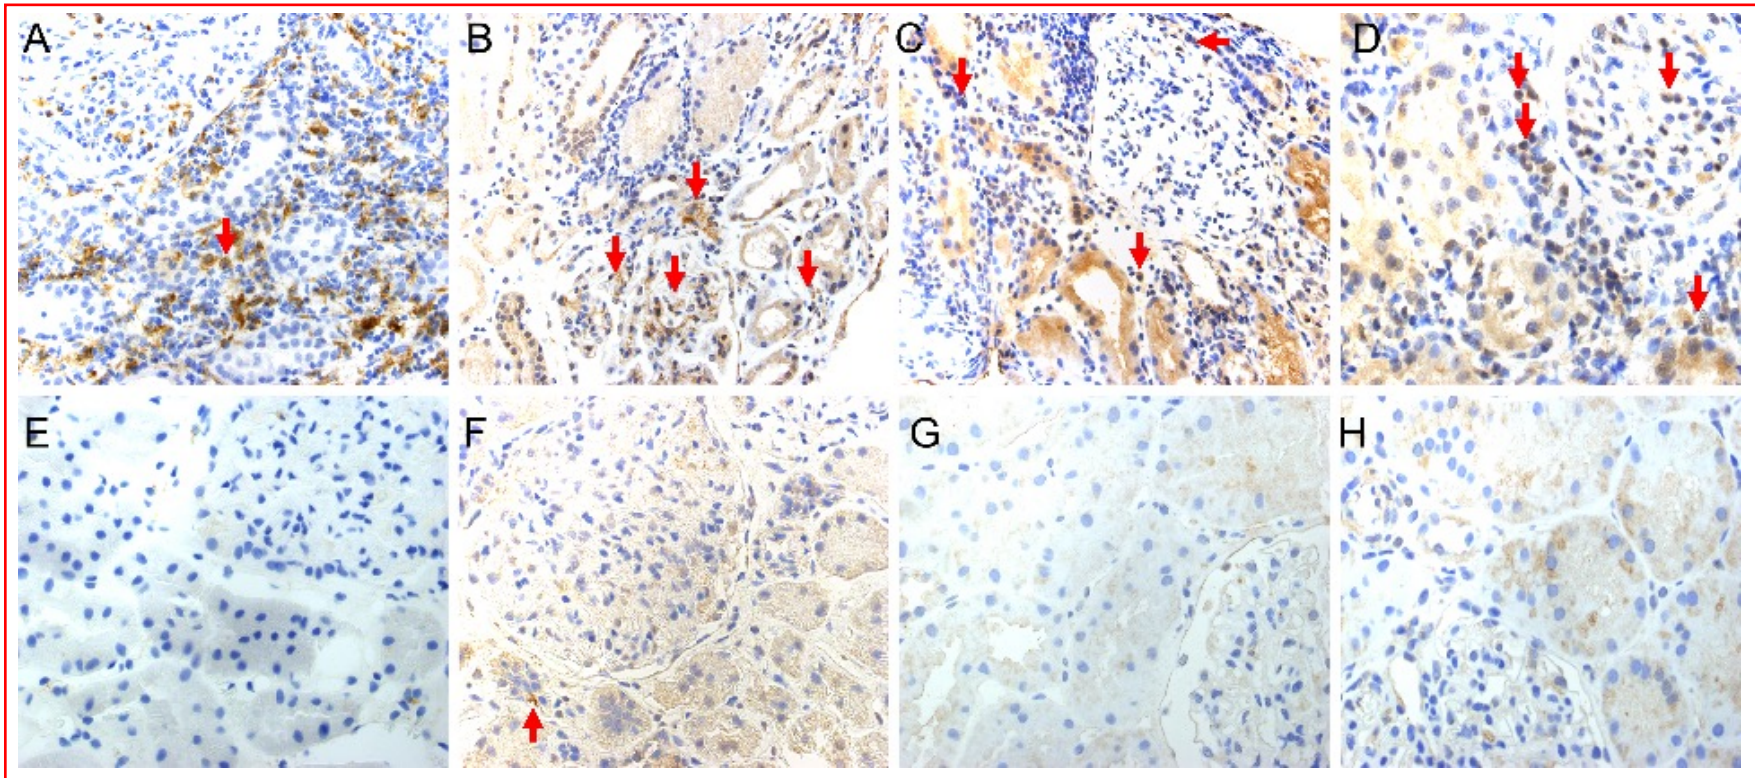



Photomicrographs of representative kidney allograft biopsies with TCMR (top panel) and Normal (bottom panel) depict staining for CD68+ macrophages (**A and E**), Toll-like receptor TLR4 (**B and F**), NOD-like receptor NLRP1 (**C and G**), and inflammatory caspase CASP1 (**D and H**), using CD68, TLR4, NLRP1, and CASP1 antibodies, respectively, on paraffin-embedded tissue sections. In the top panel, TCMR biopsies show positive staining for TLR4, NLRP1, and CASP1 in the macrophages. Some of the stained macrophages are shown by a red arrow. In the bottom panel, the Normal biopsies are negative for CD68, TLR4, NLRP1, and CASP1, except for an occasional cell that stained positive for TLR4 (F). Photomicrographs A to C are shown magnified 400 times and photomicrographs D to H are shown magnified 600 times.

Immunohistochemical staining was done using the respective antibodies on paraffin-embedded kidney allograft tissue sections on a Leica Bond system (Buffalo Grove, IL) using the modified protocol F provided by the manufacturer. The section was pretreated using heat-mediated antigen retrieval with Tris-EDTA buffer (pH = 9, epitope retrieval solution 2) for 20 min and incubated with the antibodies for 15 min at room temperature. CD3, CD68, TLR4, NLRP1, and CASP1 were detected using a horseradish peroxidase–conjugated compact polymer system and 3,3'-Diaminobenzidine as the chromogen. Each section was counterstained with hematoxylin and mounted with Leica Micromount.

Supplemental Figure 6. Relationship between intragraft abundance of mRNAs and time from transplantation to allograft biopsy.

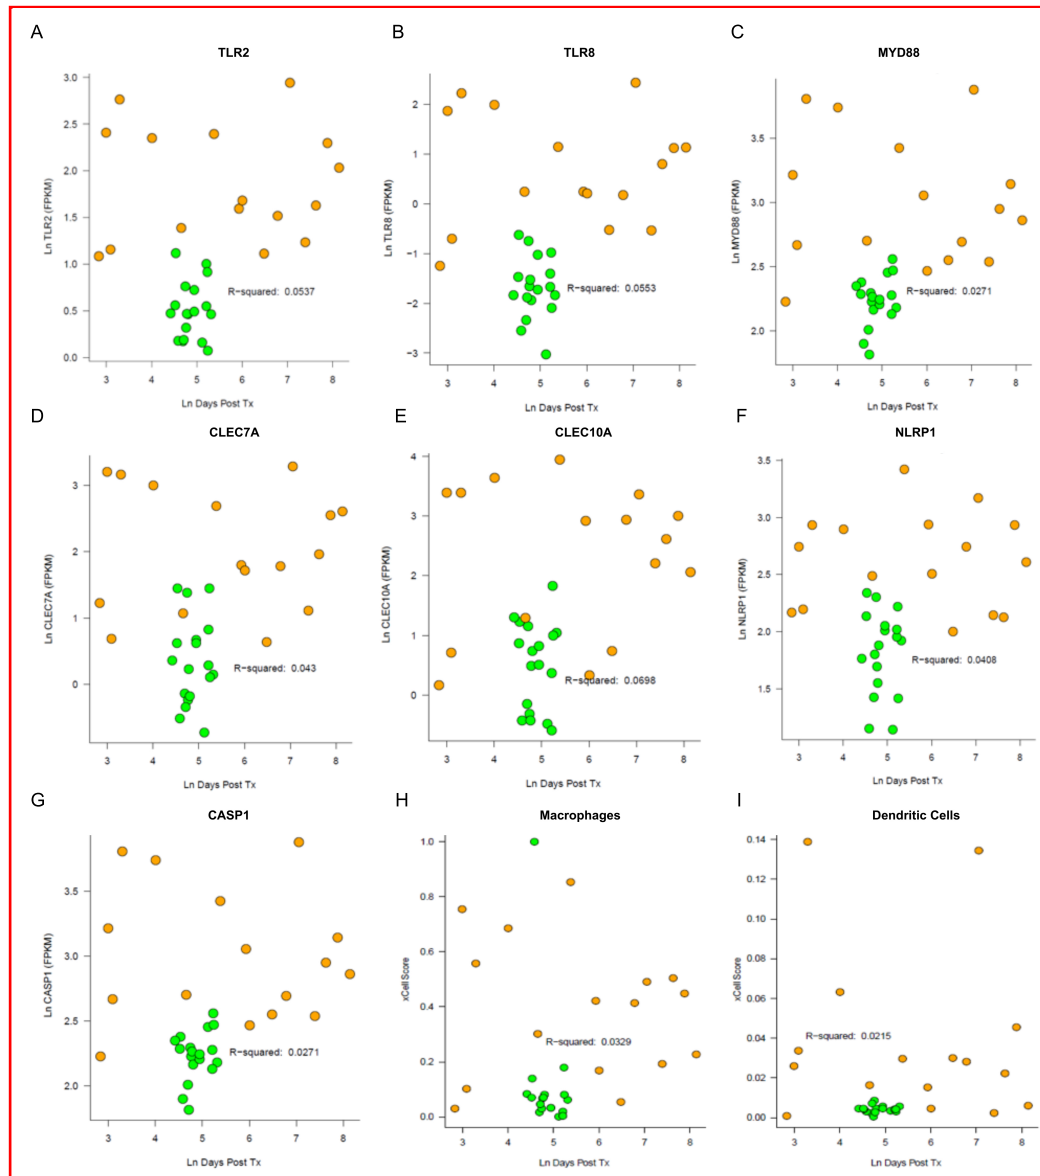

Scatter plots depict the relation between mRNA abundance of TLR2 **(A)**, TLR8 **(B)**, MYD88 **(C)**, CLEC7A **(D)**, CLEC10A **(E)**, NLRP1 **(F)**, or CASP1 **(G)** and time from transplantation to the allograft biopsy. Also shown are the relation between xCell scores of macrophages **(H)** or dendritic cells **(I)** and time from transplantation to the allograft biopsy.

Supplemental Figure 7. Intragraft abundance of mRNAs in TCMR and Normal compared to abundance of mRNAs in native non-transplant kidneys.

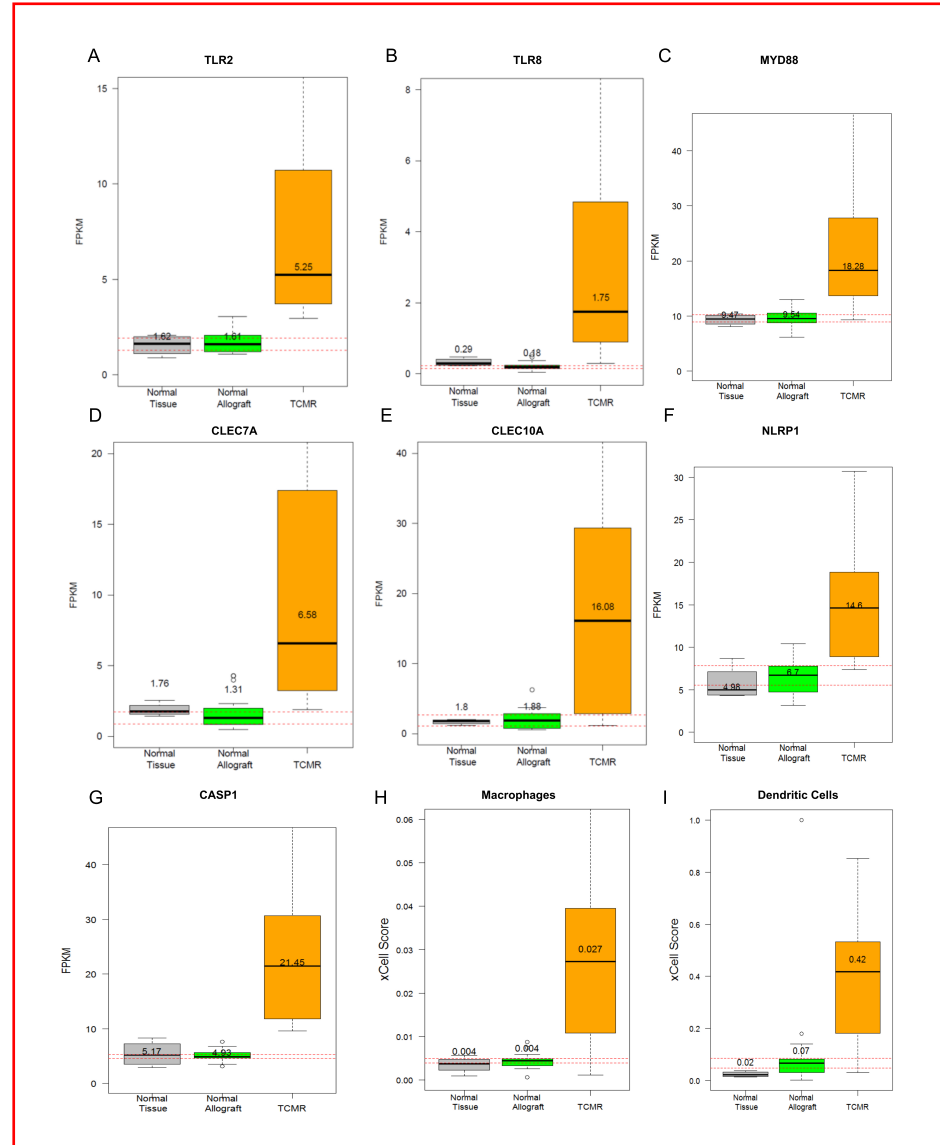

Box plots depict the intragraft and native kidney abundance of mRNAs of TLR2 **(A)**, TLR8 **(B)**, MYD88 **(C)**, CLEC7A **(D)**, CLEC10A **(E)**, NLRP1 **(F)**, and CASP1 **(G)**. We analyzed the RNA-sequencing data of four native non-transplant kidneys (Normal Tissue) available from a public database ([proteomicsatlas.org](http://proteomicsatlas.org)) and compared the expression of a select panel of mRNAs with that of TCMR and Normal. The horizontal dotted red lines represent the 95% confidence interval of the Normal group. Also shown are the xCell scores of macrophages **(H)** and dendritic cells **(I)** in the three groups.

**Supplemental Table 1. Characteristics of kidney allograft recipients and RNA samples.**

| Characteristics                                                                              | Kidney Allograft Biopsy         |                  |
|----------------------------------------------------------------------------------------------|---------------------------------|------------------|
|                                                                                              | Acute T Cell Mediated Rejection | Normal           |
|                                                                                              | N=16                            | N=18             |
| <b>At the time of transplant</b>                                                             |                                 |                  |
| Recipient information                                                                        |                                 |                  |
| Age, years, mean (SD)                                                                        | 47 (12)                         | 49 (12)          |
| Women, n (%)                                                                                 | 8 (50)                          | 9 (50)           |
| Racial categories, Black, n (%)                                                              | 6 (38)                          | 4 (22)           |
| Donor information                                                                            |                                 |                  |
| Age (years), mean (SD)                                                                       | 42 (17)                         | 46 (13)          |
| Women, n (%)                                                                                 | 10 (63)                         | 14 (78)          |
| Racial categories, Black, n (%)                                                              | 1 (16)                          | 1 (6)            |
| Deceased donor, n (%)                                                                        | 8 (50)                          | 7 (39)           |
| HLA-ABDR mismatch, median (IQR)                                                              | 5 (3-6)                         | 5 (3-6)          |
| Induction therapy, n (%)                                                                     | 16 (100)                        | 18 (100)         |
| Antithymocyte globulin, n (%)                                                                | 12 (75)                         | 18 (100)         |
| <b>After transplant and before the index biopsy</b>                                          |                                 |                  |
| Delayed graft function, n (%)                                                                | 4 (25)                          | 0 (0)            |
| Calcineurin inhibitors, n (%)                                                                | 15 (94)                         | 18(100)          |
| Corticosteroids maintenance, n (%)                                                           | 3 (19)                          | 2 (11)           |
| BK virus nephropathy                                                                         | 0 (0)                           | 0 (0)            |
| Biopsy proven acute rejection, n (%)                                                         | 0 (0)                           | 0 (0)            |
| <b>At the time of index allograft biopsy</b>                                                 |                                 |                  |
| Reason for biopsy, clinically indicated: surveillance, n                                     | 16:0                            | 0:18             |
| Time from transplantation to biopsy, months, median (IQR)                                    | 12.5 (1-49)                     | 3.5 (3-6)        |
| Serum creatinine, mg/dl, median (IQR)                                                        | 2.55 (1.77-3.83)                | 1.34 (1.05-1.48) |
| Serum tacrolimus trough level, ng/dl, median (IQR)                                           | 5.2 (4.2-6.7)                   | 7.0 (6.0-8.7)    |
| <b>Allograft biopsy histopathology</b>                                                       |                                 |                  |
| Number of glomeruli, median (IQR)                                                            | 13 (9-18)                       | 15 (10-18)       |
| Positive staining for SV40 large T antigen, n (%)                                            | 0 (0)                           | 0 (0)            |
| Positive staining for complement component 4d, n (%)                                         | 0 (0)                           | 0 (0)            |
| Banff category 4 – acute T cell mediated rejection, n (%)                                    | 16 (100)                        | 0 (0)            |
| Banff category 1 – normal / nonspecific, n (%)                                               | 0 (0)                           | 18 (100)         |
| Banff acute T cell mediated rejection grade 1A:1B, n                                         | 8:8                             | 0:0              |
| <b>Allograft biopsy tissue RNA</b>                                                           |                                 |                  |
| Total RNA isolated from kidney allograft biopsy tissue stored in RNAlater™, ng, median (IQR) | 2143 (1270-3030)                | 2085 (1545-2758) |
| Total RNA purity, A260/A280, median (IQR)                                                    | 2.06 (1.96-2.13)                | 2.00 (1.97-2.02) |
| Total RNA integrity, RNA integrity number, median (IQR)                                      | 7.75 (7.0-8.5)                  | 8.2 (7.4-8.7)    |
| Quantity of total RNA used for mRNA sequencing, ng                                           | 400                             | 400              |

Kidney allograft biopsies were categorized using the Banff 2017 update of the Banff '97 classification. All biopsies reported as acute T cell mediated rejection (TCMR) were performed because of acute graft dysfunction. All biopsies reported as Normal were done for surveillance purpose in recipients without acute graft dysfunction. All but one patient received calcineurin inhibitor (Tacrolimus)-based maintenance immunosuppression. One recipient in the TCMR group received ASKP1240, a fully human antibody targeting CD40 in antigen presenting cells. This patient was converted to Tacrolimus after the rejection. All 34 recipients received Mycophenolate Mofetil. We assessed RNA purity by the ratio of absorbance at 260 nm and 280 nm. A ratio of ~2.0 is accepted as 'pure' for RNA. We assessed RNA integrity using the RNA integrity number (RIN), an algorithm developed by Agilent Technologies, that assigns a numerical score from 1 to 10 for total RNA. A score of 1 is the most degraded profile while a score of 10 is the most intact RNA.

**Supplemental Table 2. Intragraft expression of mRNAs encoding Toll-Like Receptors in TCMR and Normal kidney allograft biopsies.**

**Supplemental Table 2A. Plasma membrane and endosomal/lysosomal TLRs.**

**Plasma membrane TLRs**

| Symbol | Normal N=18 |      | TCMR N=16 |      | FC   | PValue   | P-FDR    |
|--------|-------------|------|-----------|------|------|----------|----------|
|        | Median      | IQR  | Median    | IQR  |      |          |          |
| TLR1   | 1.40        | 0.65 | 3.59      | 3.20 | 2.73 | 2.32E-11 | 7.37E-10 |
| TLR2   | 1.61        | 0.74 | 5.25      | 6.75 | 3.89 | 6.81E-18 | 1.34E-15 |
| TLR4   | 2.02        | 1.35 | 6.27      | 4.08 | 2.48 | 5.55E-10 | 1.35E-08 |
| TLR5   | 1.35        | 2.44 | 3.18      | 3.23 | 1.61 | 9.86E-03 | 2.85E-02 |
| TLR6   | 0.18        | 0.14 | 0.79      | 0.58 | 4.68 | 1.02E-14 | 7.05E-13 |

**Endosomal/lysosomal TLRs**

| Symbol | Normal N=18 |      | TCMR N=16 |      | FC    | PValue   | P-FDR    |
|--------|-------------|------|-----------|------|-------|----------|----------|
|        | Median      | IQR  | Median    | IQR  |       |          |          |
| TLR3   | 2.78        | 3.08 | 5.34      | 3.78 | 1.34  | 3.11E-03 | 1.15E-02 |
| TLR7   | 0.32        | 0.30 | 2.43      | 2.32 | 5.96  | 5.86E-17 | 7.54E-15 |
| TLR8   | 0.18        | 0.10 | 1.75      | 2.96 | 14.32 | 6.43E-19 | 1.57E-16 |
| TLR10  | 0.15        | 0.10 | 1.00      | 1.36 | 6.37  | 2.22E-11 | 6.75E-10 |

The median and inter quartile range (IQR) values for intragraft mRNA abundance in TCMR and Normal biopsies are shown as fragments per kilobase of exon per million reads mapped (FPKM) value which normalizes the RNA sequencing data for sequencing depth (per million scaling factor) and gene length (per kilobase scaling factor). Median and IQR of the FPKM were computed using Cufflinks bioinformatics tool (1). The difference in intragraft expression of mRNAs between TCMR and Normal biopsies is expressed as Fold Change (FC). A FC value of 1 corresponds to no difference between the groups (TCMR/Normal=1); FC > 1 denotes expression of TCMR > Normal, and FC with a negative sign denotes expression of Normal > TCMR. Fold change was calculated using edgeR. Probability (P) values are adjusted for false discovery rate (FDR) by applying the Benjamini-Hochberg method on the P value. Thus, for a given gene, the median (IQR) FPKM value for each group is derived from Cufflinks, while the FC and P-FDR value is derived from edgeR.

1. Trapnell C, Roberts A, Goff L, Pertea G, Kim D, Kelley DR, et al. Differential gene and transcript expression analysis of RNA-seq experiments with TopHat and Cufflinks. *Nat Protoc.* 2012;7(3):562-78. <http://cole-trapnell-lab.github.io/cufflinks/cufflinks/>

**Supplemental Table 2B. Association between intra-graft abundance of mRNAs for TLRs and mRNAs for their key signal adapters/transducers in human kidney allografts.**

| Symbol | FC    | FC<br>P-FDR | TLR1             | TLR2             | TLR3             | TLR4             | TLR5             | TLR6             | TLR7             | TLR8              | TLR10            |
|--------|-------|-------------|------------------|------------------|------------------|------------------|------------------|------------------|------------------|-------------------|------------------|
|        |       |             | 2.73<br>3.00E-10 | 3.89<br>3.42E-16 | 2.48<br>1.15E-02 | 1.61<br>8.33E-09 | 4.68<br>2.50E-02 | 1.34<br>4.39E-13 | 5.96<br>7.55E-15 | 14.32<br>1.57E-16 | 6.37<br>6.76E-10 |
| MYD88  | 2.03  | 1.50E-07    | 0.934            | 0.949            | 0.297            | 0.843            | 0.096            | 0.928            | 0.902            | 0.953             | 0.764            |
| MAP3K1 | 1.62  | 4.11E-03    | 0.35             | 0.301            | 0.866            | 0.561            | 0.924            | 0.34             | 0.409            | 0.19              | 0.149            |
| MAPK1  | 1.09  | 2.79E-01    | 0.324            | 0.27             | 0.839            | 0.547            | 0.842            | 0.33             | 0.368            | 0.198             | 0.137            |
| IKBKE  | 3.07  | 2.01E-09    | 0.894            | 0.904            | 0.281            | 0.837            | 0.076            | 0.906            | 0.844            | 0.921             | 0.67             |
| IRAK1  | 1.14  | 2.87E-01    | 0.686            | 0.708            | -0.138           | 0.496            | -0.293           | 0.657            | 0.583            | 0.675             | 0.567            |
| IRF1   | 4.92  | 6.21E-15    | 0.905            | 0.913            | 0.325            | 0.863            | 0.11             | 0.894            | 0.838            | 0.92              | 0.649            |
| IRF2   | 1.43  | 1.49E-04    | 0.929            | 0.923            | 0.434            | 0.907            | 0.273            | 0.915            | 0.878            | 0.896             | 0.66             |
| IRF4   | 18.70 | 2.30E-17    | 0.84             | 0.855            | 0.176            | 0.663            | 0.107            | 0.831            | 0.795            | 0.789             | 0.706            |
| NFATC1 | 1.63  | 5.50E-04    | 0.887            | 0.865            | 0.441            | 0.881            | 0.262            | 0.862            | 0.803            | 0.841             | 0.514            |
| NFATC2 | 3.68  | 8.10E-12    | 0.954            | 0.941            | 0.547            | 0.943            | 0.359            | 0.951            | 0.928            | 0.885             | 0.683            |
| TP53   | 1.40  | 1.82E-04    | 0.915            | 0.889            | 0.461            | 0.832            | 0.217            | 0.892            | 0.852            | 0.796             | 0.702            |

The relationship intra-graft abundance of mRNAs for TLRs (columns) and mRNAs for their key signal adapters/transducers (rows) are expressed as correlation coefficients (r). Yellow/red represents r values that are significant at false discovery rate adjusted (by Benjamini-Hochberg method) P value <0.001.



**Supplemental Table 3. Intragraft expression of mRNAs encoding C-Type Lectins, C-Type Lectin Receptors, and Mannose Receptors in TCMR and Normal biopsies.**

| Symbol   | Normal N=18 |        | TCMR N=16 |        | FC    | PValue   | P-FDR    |
|----------|-------------|--------|-----------|--------|-------|----------|----------|
|          | Median      | IQR    | Median    | IQR    |       |          |          |
| CLEC12A* | 0.000       | 0.000  | 3.398     | 11.689 | 15.12 | 4.99E-17 | 6.51E-15 |
| CLEC7A   | 1.305       | 1.095  | 6.584     | 12.708 | 5.47  | 1.37E-13 | 6.56E-12 |
| CLEC10A  | 1.882       | 2.043  | 16.082    | 25.863 | 7.15  | 2.21E-11 | 6.76E-10 |
| CD209    | 0.844       | 0.551  | 2.896     | 2.971  | 3.92  | 2.55E-11 | 7.67E-10 |
| CD69     | 0.458       | 0.367  | 2.774     | 5.480  | 6.46  | 5.43E-11 | 1.53E-09 |
| CLEC4E   | 0.446       | 0.482  | 2.946     | 3.436  | 5.74  | 8.30E-11 | 2.23E-09 |
| CLEC2B   | 2.866       | 1.213  | 9.172     | 7.680  | 2.95  | 2.80E-10 | 6.90E-09 |
| CLEC4A   | 1.949       | 1.793  | 6.609     | 6.442  | 3.37  | 1.89E-09 | 3.93E-08 |
| CLEC4D   | 0.044       | 0.062  | 0.262     | 0.306  | 8.10  | 7.54E-08 | 1.12E-06 |
| CLEC5A** | 0.000       | 0.000  | 0.000     | 0.000  | 0.00  | 1.07E-07 | 1.54E-06 |
| CLEC4C   | 0.108       | 0.060  | 0.398     | 0.514  | 6.15  | 2.46E-06 | 2.60E-05 |
| CLEC17A  | 0.093       | 0.033  | 0.367     | 0.414  | 4.78  | 3.31E-06 | 3.36E-05 |
| CLEC9A   | 0.403       | 0.265  | 1.268     | 2.050  | 3.50  | 5.19E-06 | 4.98E-05 |
| MRC1     | 1.313       | 0.635  | 5.453     | 5.540  | 2.65  | 1.76E-05 | 1.43E-04 |
| CD302    | 8.791       | 3.624  | 12.986    | 5.112  | 1.48  | 1.02E-04 | 6.54E-04 |
| CLEC4G   | 0.186       | 0.146  | 0.338     | 0.314  | 3.14  | 1.72E-04 | 1.02E-03 |
| CLEC4F   | 0.310       | 0.141  | 0.684     | 0.839  | 2.52  | 4.28E-04 | 2.20E-03 |
| CLEC6A   | 0.021       | 0.033  | 0.095     | 0.261  | 3.97  | 2.22E-03 | 8.71E-03 |
| CD207    | 0.100       | 0.127  | 0.210     | 0.471  | 2.72  | 6.09E-03 | 1.99E-02 |
| CLEC18A  | 57.896      | 41.250 | 15.823    | 18.684 | -3.23 | 1.20E-04 | 7.55E-04 |
| CLEC18B  | 72.131      | 41.502 | 23.702    | 31.562 | -2.56 | 5.86E-04 | 2.87E-03 |
| CLEC3B   | 71.991      | 22.846 | 48.734    | 31.795 | -1.52 | 2.26E-03 | 8.83E-03 |
| PLA2R1   | 5.576       | 7.308  | 2.541     | 2.784  | -1.77 | 6.56E-03 | 2.11E-02 |
| CLEC11A  | 7.542       | 2.804  | 9.162     | 4.217  | -1.01 | 9.51E-01 | 9.69E-01 |
| CLEC14A  | 6.015       | 2.753  | 7.894     | 3.416  | 1.07  | 4.20E-01 | 5.51E-01 |
| CLEC16A  | 5.714       | 1.804  | 7.296     | 1.947  | 1.16  | 5.59E-02 | 1.17E-01 |
| CLEC1A   | 1.243       | 0.367  | 1.959     | 1.041  | 1.26  | 5.86E-02 | 1.22E-01 |
| MRC2     | 11.075      | 4.331  | 15.889    | 10.014 | 1.19  | 2.30E-01 | 3.52E-01 |

\* expressed in 3 Normals only  
\*\* expressed in 1 Normal and 3 TCMR

**Supplemental Table 4. Intragraft expression of mRNAs encoding NOD-Like Receptors in TCMR and Normal Biopsies.**

| Symbol | Normal N=18 |      | TCMR N=16 |       | FC    | PValue  | P-FDR   |
|--------|-------------|------|-----------|-------|-------|---------|---------|
|        | Median      | IQR  | Median    | IQR   |       |         |         |
| NLRP1  | 6.70        | 2.82 | 14.60     | 9.88  | 2.26  | 4.5E-10 | 1.1E-08 |
| NLRP2  | 1.81        | 1.28 | 2.39      | 2.25  | 1.18  | 4.3E-01 | 5.6E-01 |
| NLRP3  | 0.37        | 0.23 | 1.29      | 1.32  | 3.82  | 1.3E-10 | 3.6E-09 |
| NLRP6  | 0.79        | 0.32 | 0.80      | 0.59  | -1.10 | 6.9E-01 | 7.9E-01 |
| NLRP7  | 0.04        | 0.09 | 0.19      | 0.12  | 4.90  | 1.3E-04 | 7.7E-04 |
| NLRP9  | 0.21        | 0.19 | 0.18      | 0.15  | -1.42 | 4.8E-02 | 1.0E-01 |
| NLRP11 | 0.16        | 0.09 | 0.22      | 0.14  | 1.07  | 7.5E-01 | 8.3E-01 |
| NLRP12 | 0.15        | 0.07 | 0.27      | 0.24  | 1.76  | 8.2E-03 | 2.5E-02 |
| NLRP14 | 0.12        | 0.07 | 0.10      | 0.08  | -1.40 | 1.5E-01 | 2.5E-01 |
| NOD1   | 1.10        | 0.50 | 2.47      | 3.62  | 1.48  | 1.9E-05 | 1.5E-04 |
| NOD2   | 0.20        | 0.18 | 1.56      | 2.32  | 6.00  | 3.7E-15 | 3.0E-13 |
| NAIP   | 3.02        | 1.19 | 7.71      | 4.20  | 1.92  | 1.7E-06 | 1.8E-05 |
| NLRC4  | 0.34        | 0.18 | 0.88      | 1.07  | 3.12  | 1.3E-08 | 2.5E-07 |
| NLRC5  | 4.18        | 2.25 | 20.70     | 20.34 | 4.31  | 2.2E-17 | 3.8E-15 |
| NLRX1  | 6.30        | 1.41 | 6.62      | 1.32  | -1.11 | 1.2E-01 | 2.2E-01 |
| AIM2   | 0.32        | 0.27 | 3.14      | 3.95  | 12.74 | 1.2E-15 | 1.1E-13 |
| IFI16  | 10.39       | 3.66 | 30.84     | 29.43 | 3.10  | 8.6E-16 | 8.1E-14 |
| MEFV   | 0.26        | 1.99 | 0.79      | 2.14  | 4.87  | 4.0E-09 | 8.1E-08 |
| CIITA  | 1.62        | 0.94 | 13.17     | 14.68 | 2.55  | 2.0E-12 | 7.9E-11 |

**Supplemental Table 5. Gene set enrichment analysis of mRNAs encoding Pattern Recognition Receptors in TCMR and Normal.**

| <b>Gene set analysis of PRRs</b> |              |                  |                |                  |                 |                 |
|----------------------------------|--------------|------------------|----------------|------------------|-----------------|-----------------|
| <b>PRRs</b>                      | <b>Gene</b>  | <b>ROAST</b>     |                |                  | <b>ROAST</b>    | <b>Camera</b>   |
|                                  | <b>Count</b> | <b>PropDown*</b> | <b>PropUp*</b> | <b>Direction</b> | <b>P-FDR</b>    | <b>P-FDR</b>    |
| TLR                              | 9            | 0%               | 100.0%         | Up               | 1.00E-03        | 9.20E-07        |
| CLR                              | 27           | 11%              | 81.5%          | Up               | 1.00E-03        | 1.06E-05        |
| NLR                              | 18           | 11%              | 66.7%          | Up               | 1.00E-03        | 3.26E-04        |
| RLR                              | 5            | 0%               | 80.0%          | Up               | 1.00E-03        | 4.91E-03        |
| Secreted                         | 12           | 25%              | 41.7%          | Up               | 1.00E-03        | 6.22E-01        |
| <b>PRRs</b>                      | <b>71</b>    | <b>11%</b>       | <b>73%</b>     | <b>Up</b>        | <b>1.00E-03</b> | <b>6.18E-10</b> |

Gene set testing is a differential expression analysis in which a P value is assigned to a set of genes as a unit. We used ROAST (1) and CAMERA (2) for gene set testing. ROAST uses rotation, a Monte Carlo method, for multivariate regression. CAMERA estimates and incorporates the variance inflation factor associated with inter-gene correlation.

| <b>Pathway analysis of PRRs</b>          |                      |                            |                          |             |              |             |                |               |                    |                 |
|------------------------------------------|----------------------|----------------------------|--------------------------|-------------|--------------|-------------|----------------|---------------|--------------------|-----------------|
| <b>PRR Pathways</b>                      | <b>Pathway Genes</b> | <b>Expressed in Kidney</b> | <b>EdgeR DE Analysis</b> |             |              |             |                |               | <b>GSEA (GAGE)</b> |                 |
|                                          |                      |                            | <b>DE Genes</b>          | <b>% DE</b> | <b>DE Up</b> | <b>% Up</b> | <b>DE Down</b> | <b>% Down</b> | <b>stat. mean</b>  | <b>q-val Up</b> |
| Toll-like receptor signaling pathway     | 104                  | 86                         | 58                       | 67.4%       | 55           | 94.8%       | 3              | 5.2%          | 3.615              | 3.76E-45        |
| NOD-like receptor signaling pathway      | 168                  | 147                        | 101                      | 68.7%       | 90           | 89.1%       | 11             | 10.9%         | 4.247              | 1.94E-62        |
| RIG-I-like receptor signaling pathway    | 70                   | 54                         | 33                       | 61.1%       | 31           | 93.9%       | 2              | 6.1%          | 1.962              | 6.49E-15        |
| Cytosolic DNA-sensing pathway            | 64                   | 48                         | 29                       | 60.4%       | 25           | 86.2%       | 4              | 13.8%         | 2.021              | 1.94E-15        |
| C-type lectin receptor signaling pathway | 104                  | 97                         | 58                       | 59.8%       | 55           | 94.8%       | 3              | 5.2%          | *                  | 1.28E-08        |

\*enrichment assessed with Camera

Enriched PRR pathways (Kyoto Encyclopedia of Genes and Genomes [KEGG] database (3)) in TCMR biopsies. We used GAGE (Generally Applicable Gene-set Enrichment (4)) for this analysis. For a given pathway, the GAGE algorithm tests whether specific gene sets are significantly differentially expressed (each TCMR vs. all Normal) relative to the background whole gene set of 16,381 genes (each TCMR vs. all Normal) that we identified, using a rank-based two-sample T test (equivalent to the non-parametric Mann-Whitney test). For each gene set, a global P value is derived on a meta-test on the negative log sum of all P values from the individual TCMR vs. Normal comparisons. The stat mean is the mean of the individual statistics from multiple gene set tests. Its absolute value measures the magnitude of gene-set level changes, and its sign indicates direction of the changes (positive: up regulated in TCMR, negative: down regulated in TCMR). The q value is the false discovery rate adjustment, by Benjamini-Hochberg method, on the global P value.

1. Wu D, Lim E, Vaillant F, Asselin-Labat ML, Visvader JE, and Smyth GK. ROAST: rotation gene set tests for complex microarray experiments. *Bioinformatics*. 2010;26(17):2176-82.
2. Wu D, and Smyth GK. Camera: a competitive gene set test accounting for inter-gene correlation. *Nucleic Acids Res*. 2012;40(17):e133.
3. Kanehisa M, Furumichi M, Tanabe M, Sato Y, and Morishima K. KEGG: new perspectives on genomes, pathways, diseases and drugs. *Nucleic Acids Res*. 2017;45(D1):D353-D61. <https://www.kegg.jp>
4. Luo W, Friedman MS, Shedden K, Hankenson KD, and Woolf PJ. GAGE: generally applicable gene set enrichment for pathway analysis. *BMC Bioinformatics*. 2009;10:161.

**Supplemental Table 6. Association between intragraft abundance of mRNAs for NLRs and mRNAs for Caspases in TCMR and Normal biopsies.**

|                              |       | FC       | NLRP1    | NLRP3    | NLRP7    | NLRP12   | NAIP     | NOD1     | NOD2     | AIM2     | IFI16    | NLRP2    | NLRP6    | NLRP9    | NLRP11   | NLRP14   |
|------------------------------|-------|----------|----------|----------|----------|----------|----------|----------|----------|----------|----------|----------|----------|----------|----------|----------|
| Symbol                       | FC    | P-FDR    | 5.60E-09 | 2.83E-09 | 6.90E-04 | 2.15E-02 | 9.02E-06 | 7.15E-05 | 2.26E-13 | 7.44E-14 | 3.46E-14 | 5.36E-01 | 8.05E-01 | 1.41E-01 | 7.81E-01 | 2.87E-01 |
| <b>Inflammatory Caspases</b> |       |          |          |          |          |          |          |          |          |          |          |          |          |          |          |          |
| CASP1                        | 3.94  | 1.71E-15 | 0.867    | 0.928    | 0.757    | 0.766    | 0.728    | 0.845    | 0.95     | 0.974    | 0.978    | 0.395    | 0.082    | -0.152   | -0.002   | -0.345   |
| CASP4                        | 2.30  | 1.04E-10 | 0.747    | 0.828    | 0.735    | 0.647    | 0.721    | 0.789    | 0.858    | 0.973    | 0.904    | 0.462    | -0.038   | -0.187   | -0.135   | -0.347   |
| CASP5                        | 7.39  | 3.66E-06 | 0.562    | 0.688    | 0.574    | 0.629    | 0.623    | 0.672    | 0.742    | 0.912    | 0.814    | 0.426    | -0.034   | -0.187   | -0.108   | -0.256   |
| CASP12                       | -1.09 | 8.79E-01 | -0.039   | -0.084   | -0.076   | 0.142    | 0.252    | 0.138    | -0.021   | -0.137   | -0.039   | 0.456    | -0.526   | 0.79     | 0.234    | 0.309    |
| <b>Apoptosis Caspases</b>    |       |          |          |          |          |          |          |          |          |          |          |          |          |          |          |          |
| CASP3                        | 1.94  | 3.12E-10 | 0.838    | 0.885    | 0.706    | 0.707    | 0.771    | 0.857    | 0.898    | 0.937    | 0.948    | 0.432    | -0.023   | -0.074   | -0.048   | -0.299   |
| CASP6                        | 1.05  | 5.88E-01 | 0.191    | 0.192    | 0.213    | 0.151    | 0.181    | 0.369    | 0.182    | 0.217    | 0.186    | 0.045    | 0.119    | 0.041    | 0.259    | -0.06    |
| CASP7                        | 1.28  | 1.05E-02 | 0.577    | 0.574    | 0.396    | 0.46     | 0.736    | 0.72     | 0.637    | 0.596    | 0.725    | 0.59     | -0.379   | 0.42     | 0.069    | -0.205   |
| CASP8                        | 1.64  | 1.54E-07 | 0.887    | 0.91     | 0.716    | 0.767    | 0.727    | 0.874    | 0.903    | 0.918    | 0.933    | 0.356    | 0.173    | -0.087   | 0.117    | -0.281   |
| CASP9                        | -1.45 | 1.43E-04 | -0.391   | -0.449   | -0.331   | -0.542   | -0.52    | -0.425   | -0.409   | -0.406   | -0.363   | 0.127    | -0.302   | -0.062   | -0.309   | -0.334   |
| CASP10                       | 1.58  | 4.85E-06 | 0.774    | 0.765    | 0.629    | 0.675    | 0.841    | 0.869    | 0.8      | 0.782    | 0.852    | 0.695    | -0.319   | 0.27     | 0.071    | -0.13    |

The relation between NLRs (columns) and caspases (rows) are expressed as correlation coefficients (r). Yellow/red represents r values that are significant at false discovery rate adjusted (by Benjamini-Hochberg method) P value <0.001.

**Supplemental Table 7. Intragraft expression of mRNAs encoding secreted PRRs and Complements in TCMR and Normal.**

**Supplemental Table 7A. Secreted PRRs.**

| Symbol  | Normal N=18 |        | TCMR N=16 |        | FC    | PValue   | P-FDR    |
|---------|-------------|--------|-----------|--------|-------|----------|----------|
|         | Median      | IQR    | Median    | IQR    |       |          |          |
| COLEC12 | 1.536       | 2.110  | 3.110     | 3.026  | 1.66  | 1.11E-02 | 3.15E-02 |
| COLEC11 | 25.589      | 17.896 | 14.979    | 12.765 | -2.66 | 2.88E-05 | 2.20E-04 |
| APCS    | 0.019       | 0.040  | 0.027     | 0.108  | 10.13 | 1.84E-03 | 7.46E-03 |
| FCN1    | 1.617       | 1.784  | 17.047    | 44.733 | 11.74 | 1.87E-13 | 8.65E-12 |
| FCN2    | 0.151       | 0.303  | 0.463     | 0.549  | -1.19 | 6.35E-01 | 7.41E-01 |
| FCN3    | 6.196       | 6.619  | 2.520     | 4.528  | -1.94 | 5.00E-02 | 1.07E-01 |
| NPTX1   | 0.177       | 0.142  | 0.148     | 0.120  | -1.73 | 6.23E-02 | 1.27E-01 |
| NPTX2   | 0.095       | 0.057  | 0.162     | 0.181  | 4.01  | 1.42E-04 | 8.64E-04 |
| NPTXR   | 0.550       | 0.546  | 1.320     | 0.641  | 1.57  | 1.94E-03 | 7.80E-03 |
| PTX3*   | 0.000       | 0.000  | 0.000     | 2.129  | 4.12  | 1.69E-06 | 1.85E-05 |
| SFTPD   | 0.801       | 0.374  | 0.678     | 0.837  | -1.10 | 7.65E-01 | 8.43E-01 |
| SVEP1   | 4.207       | 1.765  | 8.179     | 5.810  | 1.55  | 7.84E-03 | 2.43E-02 |

\* expressed in 7 TCMR only

**Supplemental Table 7B. Classical complement pathway.**

| Symbol   | Normal N=18 |        | TCMR N=16 |         | FC    | PValue  | P-FDR   |
|----------|-------------|--------|-----------|---------|-------|---------|---------|
|          | Median      | IQR    | Median    | IQR     |       |         |         |
| C1QA     | 46.796      | 20.830 | 168.449   | 184.756 | 6.34  | 4.7E-14 | 2.7E-12 |
| C1QB     | 34.206      | 20.662 | 183.209   | 181.760 | 8.67  | 6.9E-17 | 9.9E-15 |
| C1QC     | 28.110      | 13.161 | 118.803   | 150.781 | 7.78  | 8.0E-16 | 7.7E-14 |
| C1R      | 106.538     | 47.354 | 271.671   | 171.570 | 2.05  | 2.2E-06 | 2.4E-05 |
| C1S      | 32.087      | 40.264 | 126.252   | 83.637  | 2.53  | 7.3E-09 | 1.4E-07 |
| C2*      | 0.000       | 5.700  | 0.000     | 35.371  | 4.55  | 1.1E-08 | 2.1E-07 |
| C4A      | 78.914      | 51.799 | 99.512    | 84.184  | -1.01 | 9.8E-01 | 9.9E-01 |
| C4B      | 73.238      | 55.346 | 99.047    | 85.090  | 1.12  | 6.2E-01 | 7.3E-01 |
| C4BPA    | 0.064       | 0.101  | 0.141     | 0.273   | 2.02  | 3.9E-02 | 8.8E-02 |
| C4BPB    | 0.275       | 0.150  | 0.454     | 0.223   | 1.78  | 4.2E-02 | 9.2E-02 |
| C5       | 2.900       | 0.832  | 2.418     | 1.190   | -1.31 | 1.7E-02 | 4.4E-02 |
| C6       | 0.753       | 0.560  | 1.399     | 0.769   | 1.33  | 1.5E-01 | 2.6E-01 |
| C7       | 167.570     | 90.072 | 202.066   | 109.502 | -1.03 | 8.7E-01 | 9.2E-01 |
| C8G      | 1.416       | 1.204  | 1.460     | 1.604   | -1.17 | 4.6E-01 | 5.9E-01 |
| CD46     | 69.849      | 25.235 | 83.227    | 25.354  | 1.05  | 6.9E-01 | 7.8E-01 |
| CD55     | 8.528       | 3.633  | 14.217    | 5.734   | 1.24  | 2.5E-02 | 6.1E-02 |
| CFHR1    | 2.597       | 1.276  | 6.716     | 6.851   | 2.54  | 4.8E-03 | 1.6E-02 |
| CSMD1    | 0.347       | 0.649  | 0.415     | 0.768   | -1.95 | 6.4E-02 | 1.3E-01 |
| CSMD2    | 0.109       | 0.036  | 0.162     | 0.190   | 1.64  | 1.0E-02 | 3.0E-02 |
| SERPING1 | 131.155     | 46.509 | 264.290   | 210.620 | 1.90  | 5.0E-06 | 4.8E-05 |

\*C2 expressed in 6 TCMR and 7 Normals; C9 not expressed

**Supplemental Table 7C. Alternative and lectin complement pathway.**

| Symbol | Normal N=18 |        | TCMR N=16 |        | FC    | PValue  | P-FDR   |
|--------|-------------|--------|-----------|--------|-------|---------|---------|
|        | Median      | IQR    | Median    | IQR    |       |         |         |
| C3     | 16.091      | 23.699 | 32.132    | 93.807 | 8.21  | 5.3E-11 | 1.6E-09 |
| CFB    | 28.843      | 19.835 | 87.223    | 68.369 | 3.56  | 2.6E-10 | 6.7E-09 |
| CFD    | 2.934       | 2.734  | 11.729    | 8.275  | 2.90  | 5.8E-06 | 5.5E-05 |
| CFH    | 9.194       | 2.167  | 18.331    | 10.912 | 1.72  | 2.5E-04 | 1.4E-03 |
| CFI    | 121.265     | 44.086 | 131.254   | 52.137 | -1.02 | 8.9E-01 | 9.3E-01 |
| CFP    | 1.046       | 0.983  | 4.797     | 8.559  | 4.25  | 2.5E-08 | 4.3E-07 |
| MASP1  | 3.236       | 1.629  | 2.591     | 2.406  | -1.35 | 1.3E-01 | 2.3E-01 |
| MASP2  | 0.853       | 1.137  | 1.627     | 1.006  | 1.12  | 3.8E-01 | 5.1E-01 |

**Supplemental Table 7D. Complement receptors & inhibitors.**

| Symbol | Normal N=18 |         | TCMR N=16 |         | FC    | PValue  | P-FDR   |
|--------|-------------|---------|-----------|---------|-------|---------|---------|
|        | Median      | IQR     | Median    | IQR     |       |         |         |
| C3AR1  | 2.114       | 1.694   | 10.114    | 8.221   | 5.11  | 9.0E-21 | 6.7E-18 |
| C5AR1  | 2.984       | 1.042   | 5.467     | 2.680   | 1.69  | 9.5E-05 | 6.0E-04 |
| CR1    | 0.547       | 0.277   | 1.095     | 0.932   | 1.99  | 6.7E-04 | 3.1E-03 |
| CR2    | 2.912       | 6.748   | 0.409     | 1.154   | -2.41 | 4.6E-02 | 1.0E-01 |
| ITGAM  | 1.196       | 0.695   | 4.188     | 4.155   | 3.57  | 2.7E-14 | 1.6E-12 |
| ITGAX  | 1.391       | 1.013   | 10.609    | 22.879  | 7.84  | 9.9E-16 | 9.1E-14 |
| ITGB2  | 7.629       | 4.952   | 32.321    | 61.485  | 6.65  | 6.1E-18 | 1.2E-15 |
| VTN    | 3.393       | 14.758  | 0.000     | 0.000   | -2.59 | 4.1E-03 | 1.4E-02 |
| CD59   | 186.974     | 93.021  | 254.029   | 105.379 | 1.01  | 9.0E-01 | 9.4E-01 |
| CLU    | 480.871     | 241.785 | 941.003   | 615.386 | 1.33  | 8.4E-02 | 1.6E-01 |
| VSIG4  | 5.746       | 3.335   | 18.001    | 18.046  | 4.85  | 4.8E-14 | 2.8E-12 |

**Supplemental Table 8. Intragraft expression of mRNAs encoding Damage Associated Molecular Patterns in TCMR and Normal.**

| Symbol   | Normal N=18 |       | TCMR N=16 |        | FC    | PValue   | P-FDR    |
|----------|-------------|-------|-----------|--------|-------|----------|----------|
|          | Median      | IQR   | Median    | IQR    |       |          |          |
| AGER*    | 0.00        | 0.00  | 0.00      | 1.58   | 1.35  | 6.68E-03 | 2.14E-02 |
| CD36     | 2.95        | 2.61  | 7.76      | 5.06   | 2.38  | 2.06E-04 | 1.19E-03 |
| CD44     | 7.08        | 4.43  | 20.96     | 17.87  | 2.56  | 1.51E-10 | 3.86E-09 |
| DDB1     | 46.83       | 13.24 | 68.34     | 21.23  | -1.16 | 9.29E-02 | 1.74E-01 |
| DNAJA1   | 62.10       | 9.62  | 90.66     | 20.25  | 1.16  | 3.65E-02 | 8.33E-02 |
| FPR1     | 0.42        | 0.25  | 3.46      | 7.67   | 12.41 | 1.65E-17 | 2.62E-15 |
| FPR2     | 0.16        | 0.10  | 0.41      | 0.85   | 9.25  | 8.32E-09 | 1.59E-07 |
| FPR3     | 1.28        | 0.69  | 7.31      | 5.28   | 6.23  | 2.80E-21 | 3.28E-18 |
| HIF1A    | 23.43       | 11.41 | 49.65     | 28.17  | 1.73  | 1.35E-04 | 8.29E-04 |
| HMGB1    | 84.56       | 15.90 | 124.52    | 47.19  | 1.01  | 6.75E-01 | 7.73E-01 |
| HMGNI    | 67.35       | 12.48 | 84.63     | 36.80  | 1.14  | 4.51E-02 | 9.85E-02 |
| HMOX1    | 46.18       | 17.99 | 50.90     | 35.60  | 1.09  | 6.85E-01 | 7.81E-01 |
| HSP90AA1 | 201.39      | 41.34 | 211.47    | 31.10  | -1.08 | 6.09E-01 | 7.19E-01 |
| HSP90AB1 | 200.89      | 27.10 | 224.47    | 30.98  | -1.11 | 4.53E-01 | 5.82E-01 |
| HSP90B1  | 177.76      | 32.58 | 237.03    | 86.60  | 1.18  | 1.20E-01 | 2.12E-01 |
| HSPA6    | 0.79        | 0.48  | 3.09      | 3.11   | 3.58  | 1.78E-10 | 4.66E-09 |
| HSPB3    | 0.06        | 0.10  | 0.03      | 0.09   | 4.47  | 1.83E-02 | 4.71E-02 |
| HSPBAP1  | 4.53        | 1.12  | 7.58      | 3.24   | 1.46  | 7.23E-05 | 4.78E-04 |
| IL1RL1   | 5.05        | 5.24  | 1.47      | 2.87   | -1.80 | 9.59E-02 | 1.78E-01 |
| LRP1     | 18.32       | 8.40  | 30.05     | 11.08  | 1.63  | 3.16E-04 | 1.71E-03 |
| P2RX7    | 0.61        | 0.90  | 2.75      | 2.91   | 5.14  | 1.06E-11 | 3.42E-10 |
| S100A8   | 2.47        | 2.02  | 5.75      | 14.89  | 3.68  | 1.21E-05 | 1.04E-04 |
| S100A9   | 3.67        | 2.54  | 16.59     | 23.24  | 5.28  | 4.55E-12 | 1.58E-10 |
| SAP130   | 4.55        | 1.38  | 5.46      | 1.05   | 1.01  | 6.78E-01 | 7.76E-01 |
| SP1      | 7.82        | 4.53  | 12.14     | 4.05   | 1.31  | 5.48E-04 | 2.71E-03 |
| SYK      | 4.97        | 2.41  | 12.05     | 8.09   | 1.53  | 2.69E-03 | 1.02E-02 |
| TXNIP    | 132.47      | 36.27 | 245.88    | 149.22 | 1.76  | 8.83E-06 | 7.87E-05 |

\* not expressed in Normals



**Supplemental Table 9. Intragraft expression of mRNAs encoding DNA repair genes in TCMR and Normal.**

**Supplemental Table 9A. Genes recruited to location of DNA double-strand breaks.**

| Symbol   | Normal N=18 |       | TCMR N=16 |        | FC    | PValue   | P-FDR    |
|----------|-------------|-------|-----------|--------|-------|----------|----------|
|          | Median      | IQR   | Median    | IQR    |       |          |          |
| ATM      | 2.319       | 1.873 | 5.570     | 1.173  | 1.81  | 2.08E-08 | 3.64E-07 |
| BRCA1    | 0.587       | 0.189 | 1.068     | 0.633  | 1.80  | 2.30E-05 | 1.78E-04 |
| CMPK2    | 1.328       | 0.422 | 3.055     | 3.392  | 2.09  | 4.40E-05 | 3.11E-04 |
| DNASE1L3 | 16.886      | 8.683 | 19.588    | 18.707 | -1.11 | 4.48E-01 | 5.75E-01 |
| H2AFX    | 4.454       | 1.605 | 6.765     | 2.830  | 1.59  | 7.11E-04 | 3.29E-03 |
| MDC1     | 7.535       | 1.867 | 10.987    | 2.549  | 1.22  | 4.95E-02 | 1.05E-01 |
| MRE11A   | 1.854       | 1.443 | 3.909     | 1.629  | 1.59  | 1.37E-04 | 8.08E-04 |
| NBN      | 6.587       | 2.071 | 9.942     | 2.466  | 1.29  | 4.38E-04 | 2.19E-03 |
| PRKDC    | 17.607      | 6.906 | 23.909    | 8.145  | 1.22  | 1.06E-02 | 3.01E-02 |
| RAD50    | 5.676       | 2.487 | 7.905     | 2.062  | 1.05  | 4.95E-01 | 6.20E-01 |
| SMC1A    | 6.170       | 2.654 | 8.006     | 2.497  | 1.13  | 1.66E-01 | 2.71E-01 |
| TBKBP1   | 5.092       | 1.315 | 5.749     | 1.794  | -1.06 | 5.77E-01 | 6.92E-01 |
| TMEM173  | 17.229      | 6.068 | 28.036    | 14.793 | 1.52  | 5.42E-05 | 3.73E-04 |
| TP53BP1  | 6.976       | 2.248 | 9.985     | 3.114  | 1.34  | 4.04E-04 | 2.05E-03 |

**Supplemental Table 9B. Genes recruited to location of DNA replication stress.**

| Symbol | Normal N=18 |       | TCMR N=16 |        | FC    | PValue   | P-FDR    |
|--------|-------------|-------|-----------|--------|-------|----------|----------|
|        | Median      | IQR   | Median    | IQR    |       |          |          |
| ATR    | 9.808       | 8.001 | 14.093    | 13.147 | 1.30  | 3.68E-04 | 1.89E-03 |
| ATRIP  | 2.543       | 1.067 | 2.749     | 1.085  | 1.00  | 9.70E-01 | 9.80E-01 |
| BLM    | 0.280       | 0.145 | 0.911     | 1.084  | 3.72  | 1.77E-09 | 3.85E-08 |
| HUS1   | 4.173       | 0.963 | 5.232     | 1.691  | 1.01  | 9.34E-01 | 9.57E-01 |
| RAD1   | 6.655       | 2.279 | 9.048     | 2.441  | 1.03  | 6.49E-01 | 7.52E-01 |
| RAD17  | 9.513       | 2.135 | 11.272    | 3.898  | -1.03 | 6.70E-01 | 7.69E-01 |
| RPA1   | 8.482       | 3.104 | 21.777    | 15.237 | 1.18  | 1.01E-02 | 2.90E-02 |
| TREX1  | 2.543       | 1.067 | 2.749     | 1.085  | -1.08 | 9.70E-01 | 9.80E-01 |

**Supplemental Table 9C. Cytosolic nucleic acid sensor genes.**

| Symbol  | Normal N=18 |       | TCMR N=16 |        | FC    | PValue   | P-FDR    |
|---------|-------------|-------|-----------|--------|-------|----------|----------|
|         | Median      | IQR   | Median    | IQR    |       |          |          |
| ADAR    | 25.992      | 8.420 | 39.861    | 6.555  | 1.32  | 1.19E-03 | 5.01E-03 |
| EIF2AK2 | 3.794       | 1.257 | 5.977     | 2.053  | 1.35  | 4.38E-04 | 2.19E-03 |
| IFIT1   | 21.448      | 6.033 | 20.128    | 8.059  | -1.22 | 7.10E-02 | 1.40E-01 |
| MB21D1  | 0.398       | 0.252 | 1.579     | 1.240  | 4.14  | 2.30E-13 | 1.12E-11 |
| OAS1    | 13.017      | 4.628 | 25.978    | 21.509 | 1.50  | 1.04E-02 | 2.96E-02 |
| PNPT1   | 6.949       | 3.023 | 9.662     | 2.814  | -1.04 | 5.68E-01 | 6.84E-01 |
| PQBP1   | 40.512      | 8.704 | 38.090    | 12.414 | -1.30 | 1.61E-02 | 4.24E-02 |
| RNASEL  | 3.187       | 0.752 | 4.935     | 0.852  | 1.32  | 5.59E-04 | 2.69E-03 |
| SUPV3L1 | 17.725      | 4.124 | 15.985    | 5.912  | -1.20 | 1.08E-02 | 3.06E-02 |

Supplemental Table 10. Gene set enrichment analysis of mRNAs encoding DAMPs, DNA damage and repair sensors in TCMR and Normal.

| <b>Damage &amp; Repair</b>                   | <b>Gene Count</b> | <b>ROAST</b>     |                | <b>Direction</b> | <b>ROAST P-FDR</b> | <b>Camera P-FDR</b> |
|----------------------------------------------|-------------------|------------------|----------------|------------------|--------------------|---------------------|
|                                              |                   | <b>PropDown*</b> | <b>PropUp*</b> |                  |                    |                     |
| <b>DAMPs</b>                                 | <b>22</b>         | <b>9.1%</b>      | <b>68.2%</b>   | <b>Up</b>        | <b>1.00E-03</b>    | <b>2.58E-03</b>     |
| <b>DNA Damage &amp; Nucleic Acid Sensing</b> |                   |                  |                |                  |                    |                     |
| DSB                                          | 14                | 0.0%             | 78.6%          | Up               | 1.00E-03           | 3.25E-03            |
| RDS                                          | 7                 | 0.0%             | 42.9%          | Up               | 1.00E-03           | 1.81E-01            |
| NAS                                          | 9                 | 33.3%            | 55.6%          | Up               | 3.00E-03           | 2.41E-01            |
| <b>DNA Damage &amp; NAS</b>                  | <b>30</b>         | <b>10.0%</b>     | <b>63.3%</b>   | <b>Up</b>        | <b>1.00E-03</b>    | <b>7.81E-04</b>     |
| <b>Damage &amp; Repair Sensors</b>           | <b>52</b>         | <b>9.6%</b>      | <b>65.4%</b>   | <b>Up</b>        | <b>1.00E-03</b>    | <b>3.80E-05</b>     |

\* proportion of genes in set with  $z < -\sqrt{2}$  for down or  $z > \sqrt{2}$  for up  
DAMPs: Danger Associated Molecular Patterns; DSB: DNA double strand break sensing genes;  
RDS: Replication DNA Stress sensing; NAS: Nucleic Acid sensing genes

**Supplemental Table 11. Intra-graft expression of mRNAs encoding key intracellular Ca<sup>2+</sup> regulators in TCMR and Normal.**

| Symbol  | Normal N=18 |        | TCMR N=16 |        | FC    | PValue   | P-FDR    |
|---------|-------------|--------|-----------|--------|-------|----------|----------|
|         | Median      | IQR    | Median    | IQR    |       |          |          |
| SLC8A3  | 0.081       | 0.093  | 0.144     | 0.047  | 2.21  | 3.73E-03 | 1.29E-02 |
| SLC24A4 | 0.092       | 0.082  | 0.317     | 0.414  | 3.84  | 1.18E-06 | 1.33E-05 |
| ATP2A3  | 3.471       | 2.240  | 9.908     | 9.209  | 2.79  | 2.45E-10 | 6.32E-09 |
| ATP2B1  | 4.608       | 1.352  | 6.929     | 1.794  | 1.30  | 8.73E-04 | 3.90E-03 |
| ATP2B4  | 6.992       | 2.138  | 11.748    | 5.512  | 1.48  | 1.45E-05 | 1.21E-04 |
| KCNN4   | 0.712       | 0.488  | 2.944     | 4.433  | 5.67  | 6.74E-13 | 2.92E-11 |
| KCNMA1  | 1.163       | 1.505  | 2.537     | 2.104  | 1.91  | 2.77E-03 | 1.01E-02 |
| ORAI1   | 5.160       | 1.609  | 7.445     | 2.886  | 1.29  | 1.46E-02 | 3.94E-02 |
| ORAI2   | 4.609       | 2.451  | 9.028     | 2.656  | 1.35  | 2.60E-03 | 9.59E-03 |
| ORAI3   | 15.549      | 3.800  | 12.903    | 3.112  | -1.42 | 6.03E-03 | 1.92E-02 |
| ITPR3   | 2.295       | 3.693  | 8.041     | 7.107  | 1.96  | 5.21E-06 | 4.96E-05 |
| CAMK2D  | 6.086       | 2.562  | 9.585     | 2.720  | 1.29  | 1.59E-04 | 9.23E-04 |
| STIM1   | 8.473       | 1.901  | 11.383    | 3.720  | 1.20  | 6.03E-02 | 1.23E-01 |
| STIM2   | 7.955       | 1.353  | 8.820     | 2.508  | 1.11  | 1.65E-01 | 2.70E-01 |
| CALB1   | 92.093      | 73.110 | 15.427    | 70.490 | -2.66 | 1.04E-02 | 2.98E-02 |
| CALM1   | 132.711     | 32.467 | 124.094   | 18.231 | -1.37 | 5.60E-03 | 1.80E-02 |
| CALML3  | 12.176      | 23.025 | 0.550     | 3.142  | -4.05 | 7.79E-03 | 2.36E-02 |

**Supplemental Table 12. Intragraft expression of mRNAs encoding mitochondrial Ca<sup>2+</sup> uniporter genes in TCMR and Normal.**

| Symbol | Normal N=18 |       | TCMR N=16 |       | FC    | PValue   | P-FDR    |
|--------|-------------|-------|-----------|-------|-------|----------|----------|
|        | Median      | IQR   | Median    | IQR   |       |          |          |
| CAMK2D | 6.09        | 2.56  | 9.58      | 2.72  | 1.29  | 1.59E-04 | 9.21E-04 |
| MCUB   | 1.06        | 0.55  | 4.19      | 3.00  | 3.94  | 3.60E-13 | 1.65E-11 |
| MCU    | 6.65        | 1.19  | 8.52      | 1.86  | 1.16  | 3.73E-02 | 8.38E-02 |
| MICU1  | 53.82       | 22.38 | 29.06     | 10.60 | -1.83 | 4.02E-07 | 5.17E-06 |
| MICU2  | 36.67       | 3.79  | 31.01     | 5.39  | -1.32 | 8.09E-05 | 5.21E-04 |
| SMDT1  | 91.15       | 19.08 | 69.42     | 26.54 | -1.67 | 9.37E-07 | 1.09E-05 |

**Supplemental Table 13. Intragraft expression of mRNAs encoding Endoplasmic Reticulum stress and Unfolded Protein Response in TCMR and Normal.**

| Symbol       | Normal N=18 |        | TCMR N=16 |        | FC    | PValue   | P-FDR    |
|--------------|-------------|--------|-----------|--------|-------|----------|----------|
|              | Median      | IQR    | Median    | IQR    |       |          |          |
| EIF2AK3      | 2.457       | 1.401  | 5.223     | 1.646  | 1.61  | 7.21E-07 | 8.64E-06 |
| EIF2AK4      | 6.026       | 2.905  | 7.722     | 1.247  | 1.27  | 5.09E-03 | 1.67E-02 |
| EDEM1        | 6.420       | 1.203  | 9.615     | 2.883  | 1.29  | 1.27E-03 | 5.29E-03 |
| EDEM3        | 6.024       | 1.754  | 7.358     | 1.201  | 1.23  | 1.73E-02 | 4.50E-02 |
| ERO1L        | 4.153       | 0.748  | 6.896     | 2.968  | 1.48  | 4.27E-06 | 4.15E-05 |
| TXNDC5       | 42.025      | 13.302 | 67.308    | 40.416 | 2.01  | 4.99E-03 | 1.64E-02 |
| DDIT3 (CHOP) | 28.740      | 5.964  | 0.000     | 24.868 | -1.30 | 1.87E-02 | 4.79E-02 |
| ERN1         | 1.919       | 0.988  | 3.326     | 0.555  | 1.50  | 1.71E-05 | 1.40E-04 |
| PPP1R15A     | 9.138       | 2.212  | 12.771    | 3.219  | 1.24  | 1.54E-02 | 4.09E-02 |
| MAN1C1       | 21.693      | 10.299 | 16.015    | 7.572  | -1.65 | 1.24E-03 | 5.20E-03 |

**Supplemental Table 14. Intragraft expression of mRNAs encoding cellular oxidative stress in TCMR and Normal biopsies.**

| Symbol      | Normal N=18 |          | TCMR N=16 |         | FC    | PValue   | P-FDR    |
|-------------|-------------|----------|-----------|---------|-------|----------|----------|
|             | Median      | IQR      | Median    | IQR     |       |          |          |
| CYBB (NOX2) | 3.84        | 2.95     | 20.43     | 29.11   | 6.41  | 1.50E-18 | 3.75E-16 |
| NOX4        | 138.14      | 151.36   | 52.50     | 50.77   | -2.57 | 2.01E-03 | 7.76E-03 |
| NCF1        | 1.61        | 0.71     | 7.21      | 8.56    | 5.37  | 2.01E-12 | 7.93E-11 |
| NCF2        | 1.57        | 0.98     | 7.73      | 15.33   | 5.85  | 3.80E-16 | 4.08E-14 |
| NCF4        | 2.67        | 0.82     | 10.46     | 9.97    | 3.95  | 1.09E-13 | 5.69E-12 |
| SOD1        | 295.43      | 150.35   | 217.87    | 101.07  | -1.74 | 1.30E-04 | 7.78E-04 |
| SOD2        | 85.62       | 38.00    | 186.45    | 57.67   | 2.04  | 1.40E-06 | 1.55E-05 |
| TXNIP       | 132.47      | 36.27    | 245.88    | 149.22  | 1.76  | 1.14E-05 | 9.79E-05 |
| PRDX1       | 361.68      | 102.23   | 448.64    | 230.45  | -1.26 | 8.06E-02 | 1.55E-01 |
| PRDX4       | 29.04       | 8.10     | 31.21     | 9.95    | 1.04  | 7.62E-01 | 8.39E-01 |
| PRDX2       | 204.07      | 43.40    | 148.61    | 47.93   | -1.88 | 1.38E-08 | 2.52E-07 |
| PRDX3       | 163.31      | 27.00    | 125.89    | 27.49   | -1.51 | 8.53E-05 | 5.46E-04 |
| PRDX5       | 237.50      | 110.25   | 183.41    | 45.94   | -1.62 | 1.34E-04 | 7.98E-04 |
| PRDX6       | 147.50      | 43.32    | 125.85    | 23.03   | -1.48 | 6.56E-04 | 3.09E-03 |
| CAT         | 155.39      | 63.28    | 112.57    | 45.97   | -1.68 | 1.67E-04 | 9.63E-04 |
| COX4I1      | 451.76      | 159.19   | 388.34    | 61.69   | -1.62 | 5.53E-05 | 3.80E-04 |
| GPX3*       | 14380.00    | 16036.53 | 3810.78   | 6671.59 | -3.58 | 5.13E-04 | 2.51E-03 |
| GPX4        | 305.63      | 120.54   | 243.44    | 100.81  | -1.76 | 5.03E-04 | 2.47E-03 |

Supplemental Table 15. Intra-graft expression of mRNAs encoding proteins involved in glycolysis and gluconeogenesis in TCMR and Normal biopsies.

| Symbol  | Normal N=18 |         | TCMR N=16 |         | FC    | PValue   | P-FDR    |
|---------|-------------|---------|-----------|---------|-------|----------|----------|
|         | Median      | IQR     | Median    | IQR     |       |          |          |
| ACSS1   | 31.75       | 13.68   | 27.97     | 4.99    | -1.29 | 2.32E-03 | 8.78E-03 |
| ACSS2   | 53.38       | 16.11   | 32.55     | 19.36   | -1.85 | 1.78E-05 | 1.45E-04 |
| ADH1A   | 0.00        | 0.00    | 0.00      | 1.79    | 1.66  | 3.94E-02 | 8.77E-02 |
| ADH1B   | 27.88       | 25.21   | 60.24     | 43.93   | 1.13  | 5.57E-01 | 6.75E-01 |
| ADH4    | 0.32        | 0.42    | 0.35      | 0.33    | -1.89 | 4.03E-02 | 8.94E-02 |
| ADH5    | 98.66       | 16.93   | 71.31     | 28.67   | -1.61 | 1.71E-05 | 1.40E-04 |
| ADH6    | 35.00       | 10.83   | 16.42     | 22.31   | -2.19 | 1.20E-02 | 3.36E-02 |
| ADPGK   | 14.41       | 1.42    | 20.51     | 6.07    | 1.43  | 5.51E-06 | 5.21E-05 |
| AKR1A1  | 339.72      | 134.74  | 227.08    | 108.35  | -1.86 | 2.05E-03 | 7.90E-03 |
| ALDH1A3 | 1.02        | 0.45    | 2.94      | 2.55    | 2.91  | 3.04E-07 | 4.07E-06 |
| ALDH1B1 | 45.53       | 35.33   | 26.14     | 29.18   | -1.87 | 6.30E-03 | 1.99E-02 |
| ALDH2   | 374.94      | 146.85  | 178.93    | 122.88  | -2.44 | 4.25E-06 | 4.14E-05 |
| ALDH3A1 | 0.77        | 0.32    | 0.74      | 0.30    | -1.07 | 7.56E-01 | 8.35E-01 |
| ALDH3A2 | 71.94       | 10.23   | 41.81     | 35.67   | -1.82 | 2.18E-05 | 1.72E-04 |
| ALDH3B1 | 21.34       | 7.98    | 13.88     | 5.62    | -1.75 | 2.36E-03 | 8.90E-03 |
| ALDH3B2 | 0.44        | 0.20    | 0.46      | 0.26    | -1.13 | 5.49E-01 | 6.67E-01 |
| ALDH7A1 | 155.04      | 36.67   | 83.27     | 72.42   | -2.05 | 6.19E-06 | 5.75E-05 |
| ALDH9A1 | 65.92       | 21.38   | 46.00     | 24.52   | -1.54 | 2.14E-04 | 1.19E-03 |
| ALDOA   | 605.01      | 158.48  | 579.03    | 333.04  | -1.36 | 1.46E-02 | 3.93E-02 |
| ALDOB   | 3546.19     | 3255.70 | 1306.18   | 1746.17 | -2.93 | 1.05E-02 | 2.99E-02 |
| ALDOC   | 4.40        | 1.36    | 5.13      | 3.17    | 1.03  | 8.35E-01 | 8.92E-01 |
| BPGM    | 16.01       | 2.50    | 17.24     | 4.44    | -1.07 | 3.95E-01 | 5.24E-01 |
| DLAT    | 0.00        | 16.07   | 15.58     | 20.05   | -1.24 | 5.19E-03 | 1.69E-02 |
| DLD     | 63.78       | 62.16   | 42.59     | 52.90   | -1.35 | 7.66E-04 | 3.51E-03 |
| ENO1    | 524.34      | 67.75   | 554.43    | 105.02  | -1.13 | 3.19E-01 | 4.47E-01 |
| ENO2    | 3.49        | 2.64    | 7.58      | 4.64    | 1.68  | 7.55E-04 | 3.47E-03 |
| ENO4    | 0.59        | 0.17    | 0.78      | 0.21    | 1.09  | 5.27E-01 | 6.49E-01 |
| FBP1    | 380.12      | 341.27  | 103.91    | 149.49  | -3.92 | 1.65E-06 | 1.79E-05 |
| FBP2    | 0.07        | 0.13    | 0.11      | 0.11    | 1.02  | 9.52E-01 | 9.69E-01 |
| G6PC    | 42.72       | 45.21   | 13.48     | 19.27   | -3.70 | 8.36E-04 | 3.78E-03 |
| G6PC3   | 56.60       | 14.28   | 50.81     | 6.31    | -1.44 | 1.59E-04 | 9.23E-04 |
| G6PD    | 14.88       | 3.90    | 17.74     | 8.23    | 1.01  | 9.53E-01 | 9.69E-01 |
| GALM    | 80.60       | 19.63   | 41.99     | 27.60   | -2.03 | 2.26E-05 | 1.76E-04 |
| GAPDH   | 968.66      | 349.66  | 831.61    | 367.60  | -1.53 | 1.26E-02 | 3.48E-02 |
| GCK     | 0.23        | 0.17    | 0.33      | 0.23    | -1.29 | 3.99E-01 | 5.28E-01 |
| GPI     | 135.18      | 12.83   | 127.32    | 25.29   | -1.30 | 5.13E-03 | 1.68E-02 |
| HK1     | 11.22       | 4.69    | 20.46     | 17.80   | 1.42  | 1.29E-02 | 3.57E-02 |
| HK2     | 0.29        | 0.13    | 1.54      | 1.42    | 4.65  | 3.81E-15 | 3.02E-13 |
| HK3     | 0.56        | 0.43    | 2.25      | 7.23    | 8.06  | 2.46E-12 | 9.55E-11 |
| HKDC1   | 5.50        | 2.12    | 8.66      | 4.84    | 1.29  | 6.51E-02 | 1.31E-01 |
| LDHA    | 123.34      | 41.09   | 215.93    | 83.57   | 1.38  | 4.12E-03 | 1.41E-02 |
| LDHB    | 907.85      | 225.94  | 642.24    | 219.97  | -1.64 | 6.22E-04 | 2.95E-03 |
| LDHC    | 0.59        | 0.73    | 0.36      | 0.53    | -1.18 | 6.33E-01 | 7.39E-01 |
| MINPP1  | 9.41        | 1.63    | 9.17      | 2.64    | -1.14 | 1.56E-01 | 2.59E-01 |
| PCK1    | 510.05      | 237.38  | 217.61    | 359.20  | -1.96 | 4.34E-02 | 9.48E-02 |
| PCK2    | 235.89      | 200.95  | 90.07     | 91.76   | -3.12 | 1.44E-04 | 8.48E-04 |
| PDHA1   | 196.91      | 75.52   | 225.91    | 91.43   | -1.21 | 1.60E-02 | 4.23E-02 |
| PDHB    | 56.61       | 5.67    | 52.73     | 11.26   | -1.36 | 1.45E-04 | 8.54E-04 |
| PDHX    | 11.76       | 1.77    | 10.95     | 2.39    | -1.23 | 4.03E-03 | 1.38E-02 |
| PFKL    | 109.93      | 32.09   | 100.04    | 43.19   | -1.38 | 5.43E-03 | 1.76E-02 |
| PFKM    | 36.01       | 7.60    | 32.43     | 12.84   | -1.30 | 6.29E-04 | 2.98E-03 |
| PFKP    | 18.30       | 7.07    | 36.69     | 21.13   | 1.61  | 1.96E-05 | 1.57E-04 |
| PGAM1   | 103.47      | 22.65   | 91.76     | 17.78   | -1.38 | 5.40E-04 | 2.62E-03 |
| PGAM4   | 5.18        | 2.25    | 7.29      | 2.37    | 1.18  | 7.90E-01 | 8.59E-01 |
| PGK1    | 302.63      | 74.09   | 345.71    | 115.71  | -1.19 | 9.53E-02 | 1.77E-01 |
| PGM1    | 43.02       | 5.98    | 31.50     | 7.93    | -1.69 | 2.80E-11 | 8.63E-10 |
| PGM2    | 5.76        | 1.17    | 9.24      | 3.51    | 1.37  | 4.57E-04 | 2.28E-03 |
| PKLR    | 42.73       | 18.98   | 16.68     | 34.73   | -2.48 | 8.66E-03 | 2.57E-02 |
| PKM     | 205.38      | 106.08  | 305.48    | 165.67  | 1.16  | 2.93E-01 | 4.19E-01 |
| TPI1    | 397.25      | 114.77  | 322.97    | 40.17   | -1.42 | 2.94E-03 | 1.06E-02 |



**Supplemental Table 16. Intra-graft expression of mRNAs encoding proteins involved in citric acid cycle in TCMR and Normal biopsies.**

| Symbol | Normal N=18 |        | TCMR N=16 |        | FC    | PValue   | P-FDR    |
|--------|-------------|--------|-----------|--------|-------|----------|----------|
|        | Median      | IQR    | Median    | IQR    |       |          |          |
| ACLY   | 34.56       | 9.81   | 35.84     | 14.57  | -1.15 | 2.15E-01 | 3.31E-01 |
| ACO1   | 60.53       | 37.77  | 40.59     | 36.17  | -1.86 | 6.75E-04 | 3.16E-03 |
| ACO2   | 146.74      | 50.26  | 72.16     | 38.56  | -2.06 | 7.60E-06 | 6.89E-05 |
| CS     | 90.15       | 24.02  | 89.10     | 31.83  | -1.19 | 1.83E-02 | 4.72E-02 |
| DLAT   | 0.00        | 16.07  | 15.58     | 20.05  | -1.24 | 5.19E-03 | 1.69E-02 |
| DLD    | 63.78       | 62.16  | 42.59     | 52.90  | -1.35 | 7.66E-04 | 3.51E-03 |
| DLST   | 70.81       | 14.95  | 52.26     | 23.91  | -1.46 | 3.29E-04 | 1.72E-03 |
| FH     | 58.44       | 9.40   | 39.76     | 11.67  | -1.66 | 2.69E-06 | 2.78E-05 |
| IDH1   | 79.93       | 42.83  | 36.80     | 27.48  | -1.96 | 1.00E-04 | 6.27E-04 |
| IDH2   | 171.38      | 40.72  | 121.16    | 42.73  | -1.66 | 4.24E-07 | 5.43E-06 |
| IDH3A  | 17.18       | 6.41   | 23.18     | 8.21   | -1.03 | 6.45E-01 | 7.49E-01 |
| IDH3B  | 62.85       | 13.82  | 53.01     | 10.87  | -1.44 | 7.83E-05 | 5.09E-04 |
| IDH3G  | 51.08       | 19.82  | 35.86     | 12.25  | -1.51 | 4.39E-05 | 3.11E-04 |
| MDH1   | 204.45      | 64.74  | 164.78    | 72.42  | -1.56 | 4.25E-04 | 2.14E-03 |
| MDH2   | 101.04      | 46.81  | 121.48    | 56.64  | -1.62 | 2.42E-05 | 1.86E-04 |
| OGDH   | 82.44       | 21.32  | 47.47     | 21.70  | -1.77 | 4.39E-06 | 4.26E-05 |
| OGDHL  | 160.61      | 101.92 | 80.13     | 51.17  | -2.11 | 2.03E-04 | 1.14E-03 |
| PC     | 66.81       | 42.51  | 28.33     | 44.90  | -2.39 | 8.43E-05 | 5.41E-04 |
| PCK1   | 510.05      | 237.38 | 217.61    | 359.20 | -1.96 | 4.34E-02 | 9.48E-02 |
| PCK2   | 235.89      | 200.95 | 90.07     | 91.76  | -3.12 | 1.44E-04 | 8.48E-04 |
| PDHA1  | 196.91      | 75.52  | 225.91    | 91.43  | -1.21 | 1.60E-02 | 4.23E-02 |
| PDHB   | 56.61       | 5.67   | 52.73     | 11.26  | -1.36 | 1.45E-04 | 8.54E-04 |
| PDHX   | 11.76       | 1.77   | 10.95     | 2.39   | -1.23 | 4.03E-03 | 1.38E-02 |
| SUCLA2 | 31.72       | 3.01   | 26.62     | 11.17  | -1.47 | 5.38E-06 | 5.10E-05 |
| SUCLG1 | 292.31      | 168.80 | 131.85    | 110.73 | -2.47 | 4.13E-06 | 4.05E-05 |
| SUCLG2 | 79.33       | 19.97  | 51.66     | 21.59  | -1.63 | 1.29E-04 | 7.71E-04 |
